# Supplementary material
Source: PubMed Central journal article supplement (PMC5968514)
Supplement: oc8b00124_si_001.pdf [file oc8b00124_si_001.pdf]

# Environmental Processing of Lipids Driven by Aqueous Photochemistry of $\alpha$ -Keto Acids

Rebecca J. Rapf<sup>1</sup>, Russell J. Perkins<sup>1</sup>, Michael R. Dooley<sup>1</sup>, Jay A. Kroll<sup>1</sup>, Barry K. Carpenter<sup>2</sup>,  
Veronica Vaida<sup>1\*</sup>

<sup>1</sup>Department of Chemistry and Biochemistry and Cooperative Institute for Research in Environmental Sciences, University of Colorado Boulder, Boulder, Colorado, 80309, USA.

<sup>2</sup>School of Chemistry and the Physical Organic Chemistry Centre, Cardiff University, Cardiff CF10 3AT, United Kingdom.

\*Correspondence to: Vaida@colorado.edu

## Supporting Information

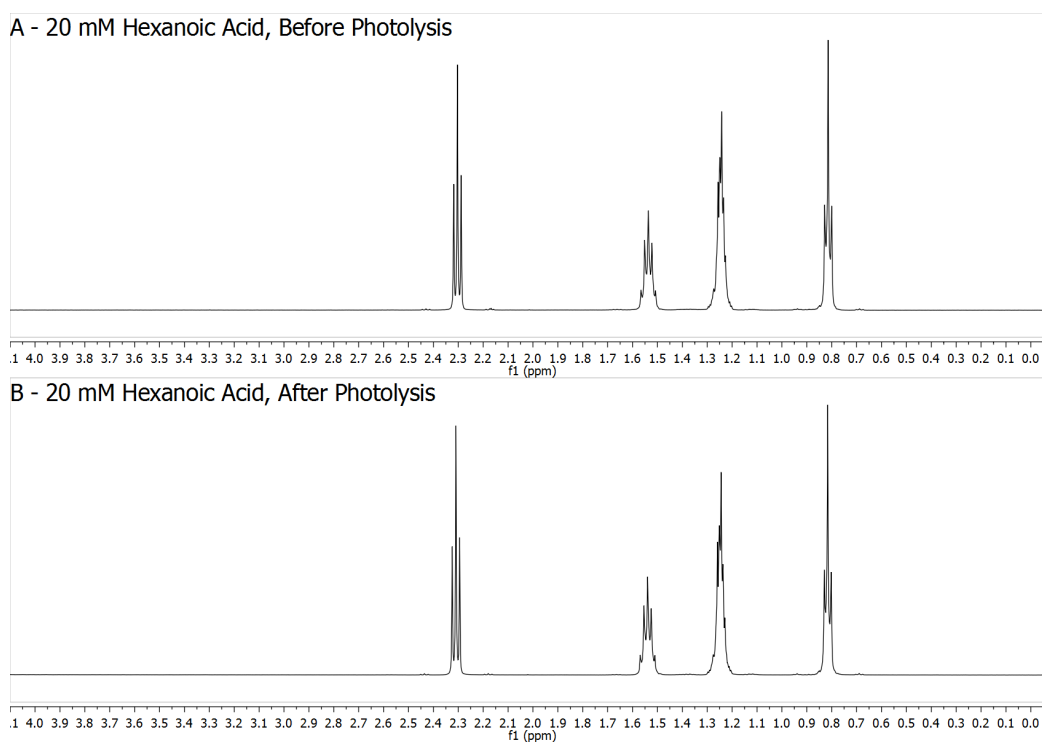

**Figure S1.** Representative NMR spectra of 20 mM hexanoic acid before (A) and after (B) 5 hours of photolysis. No observable differences are present between the two solutions.

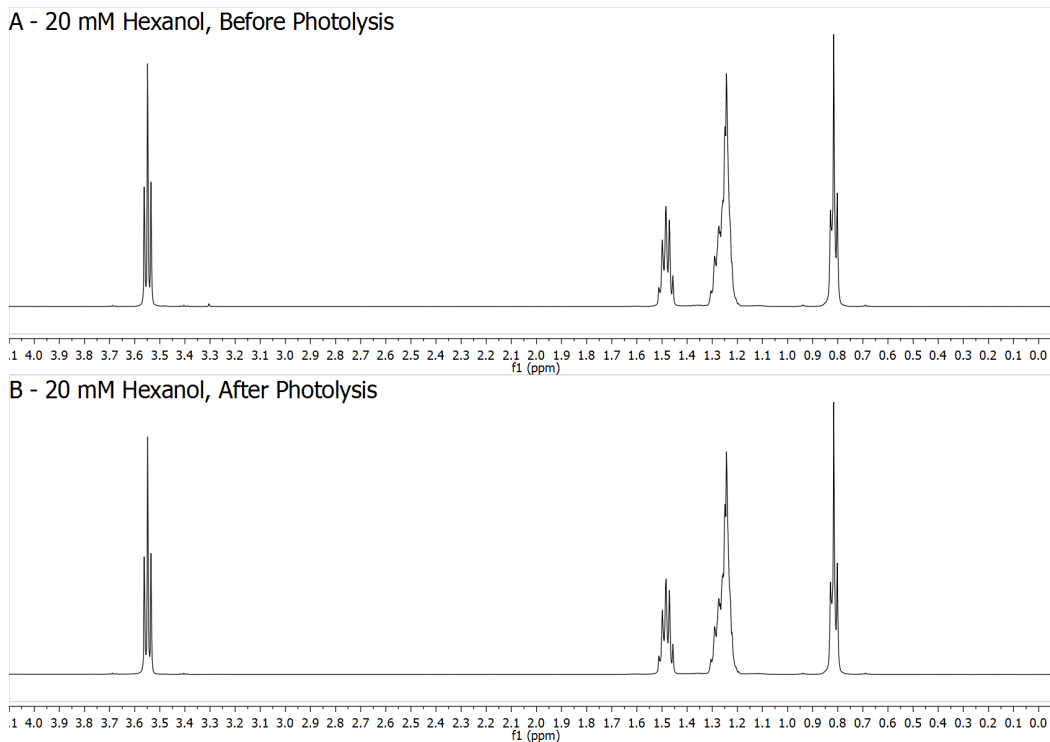

**Figure S2.** NMR spectra of 20 mM hexanol before (A) and after (B) 5 hours of photolysis. No observable differences are present between the two solutions.

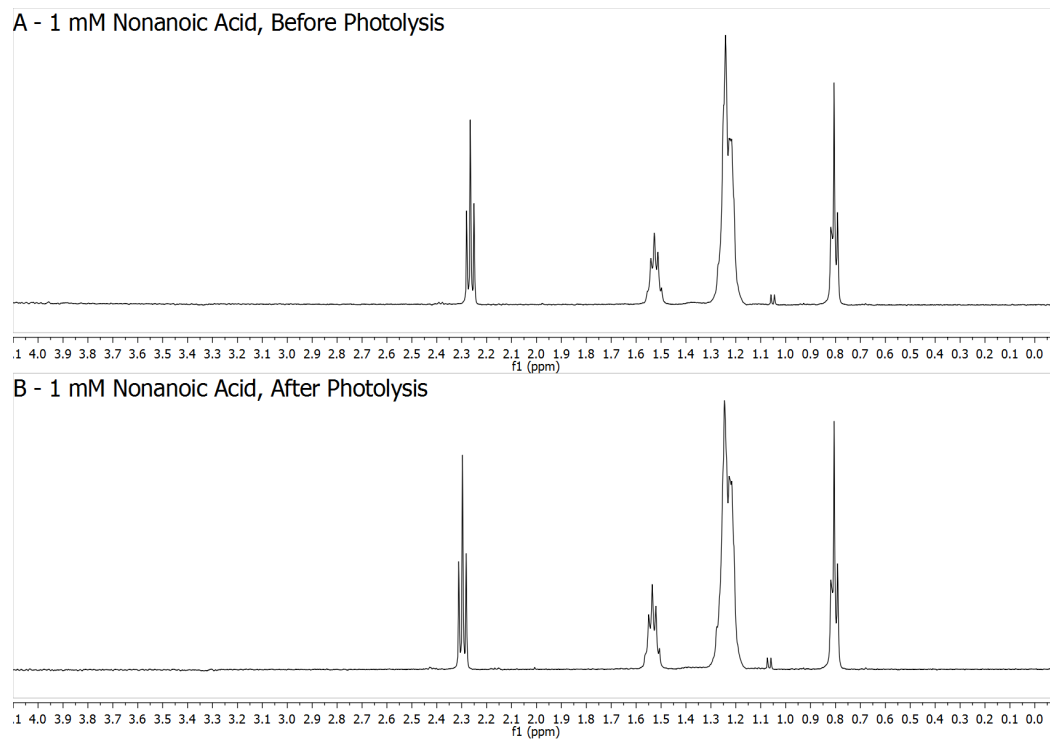

**Figure S3.** Representative NMR spectra of 1 mM nonanoic acid before (A) and after (B) 5 hours of photolysis. No observable differences are present between the two solutions.

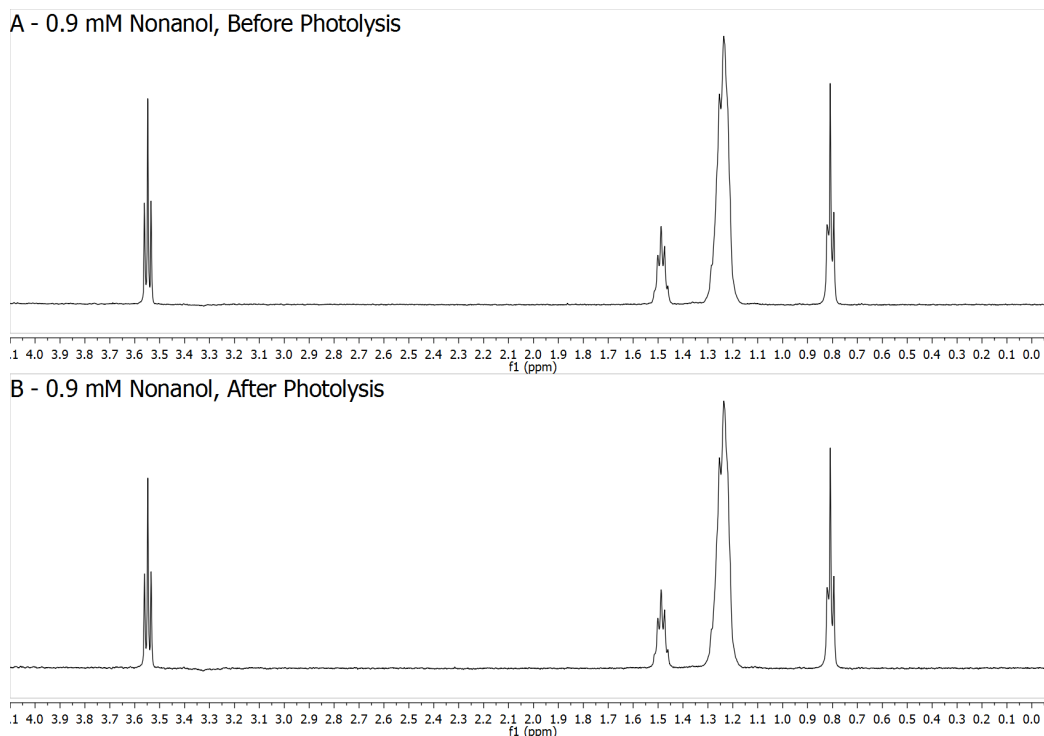

**Figure S4.** Representative NMR spectra of 0.9 mM nonanol before (A) and after (B) 5 hours of photolysis. No observable differences are present between the two solutions.

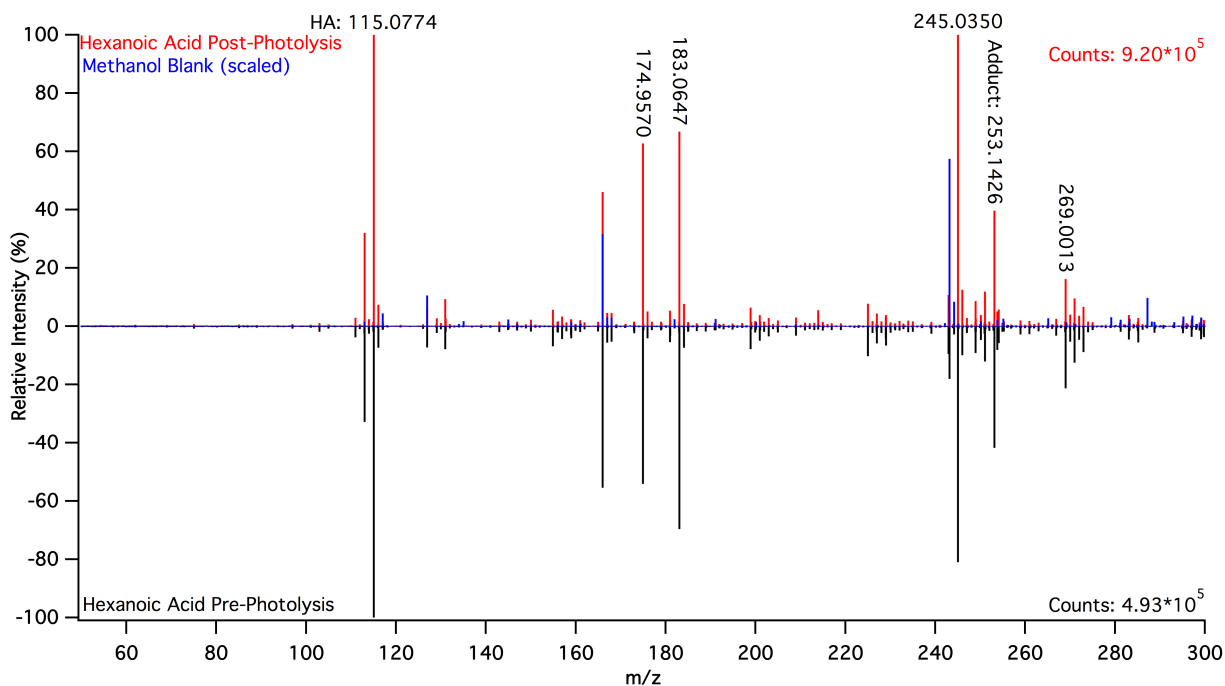

**Figure S5.** Representative ESI<sup>-</sup> MS of 20 mM hexanoic acid solutions before (black, multiplied by -1 for ease of presentation), after 5 hours of photolysis (red), and the corresponding methanol blank (blue). There is essentially no difference between the pre- and post-photolysis solutions.

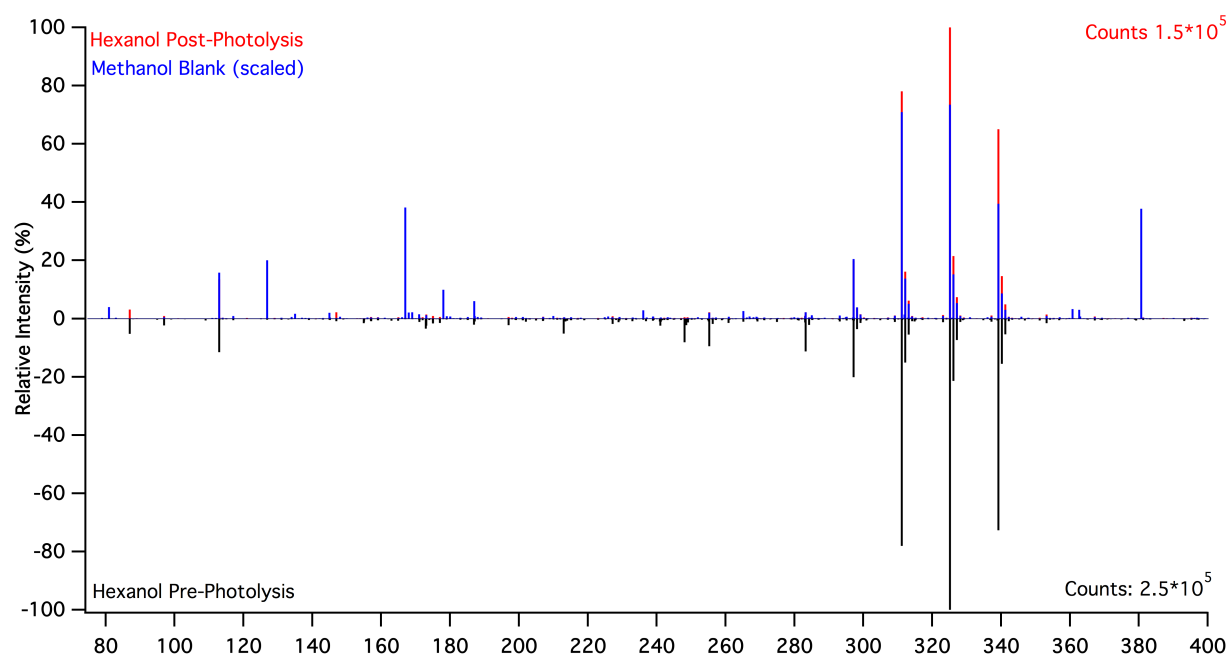

**Figure S6.** Representative ESI<sup>-</sup> MS of 20 mM hexanol solutions before (black, multiplied by -1 for ease of presentation), after 5 hours of photolysis (red), and the corresponding methanol blank (blue). Essentially all the observed signal is due to species also present in the methanol blank.

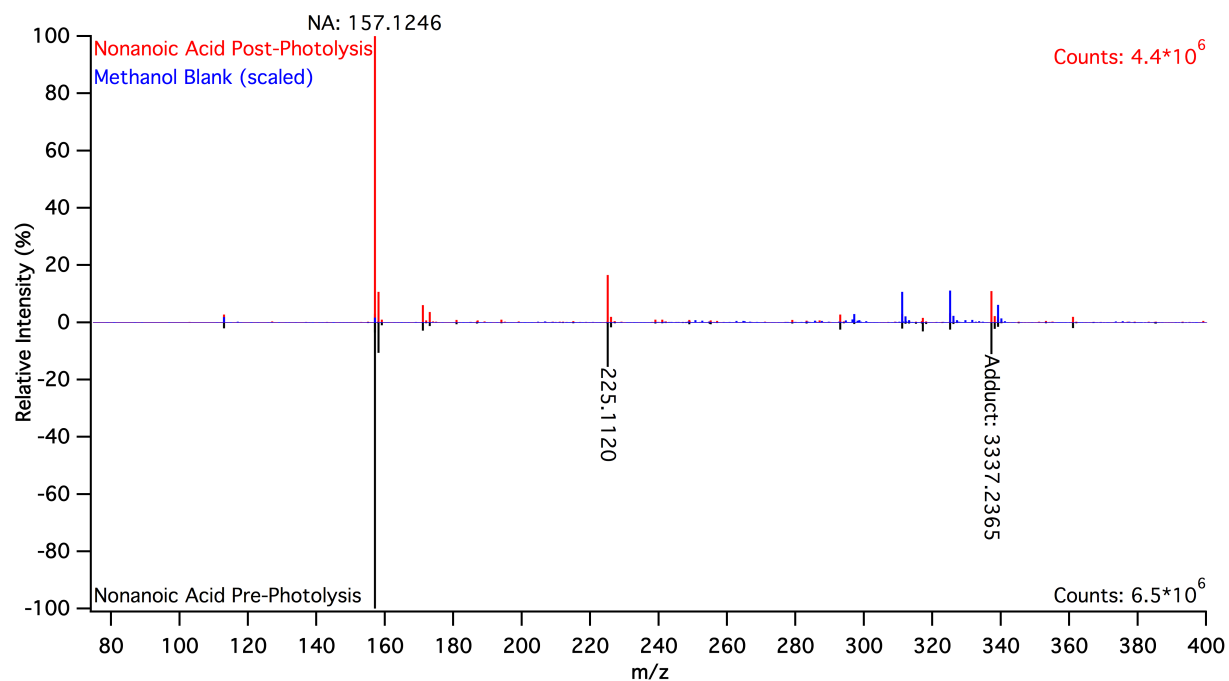

**Figure S7.** Representative ESI<sup>-</sup> MS of 1 mM nonanoic acid solutions before (black, multiplied by -1 for ease of presentation), after 5 hours of photolysis (red), and the corresponding methanol blank (blue). There is essentially no difference between the two samples.



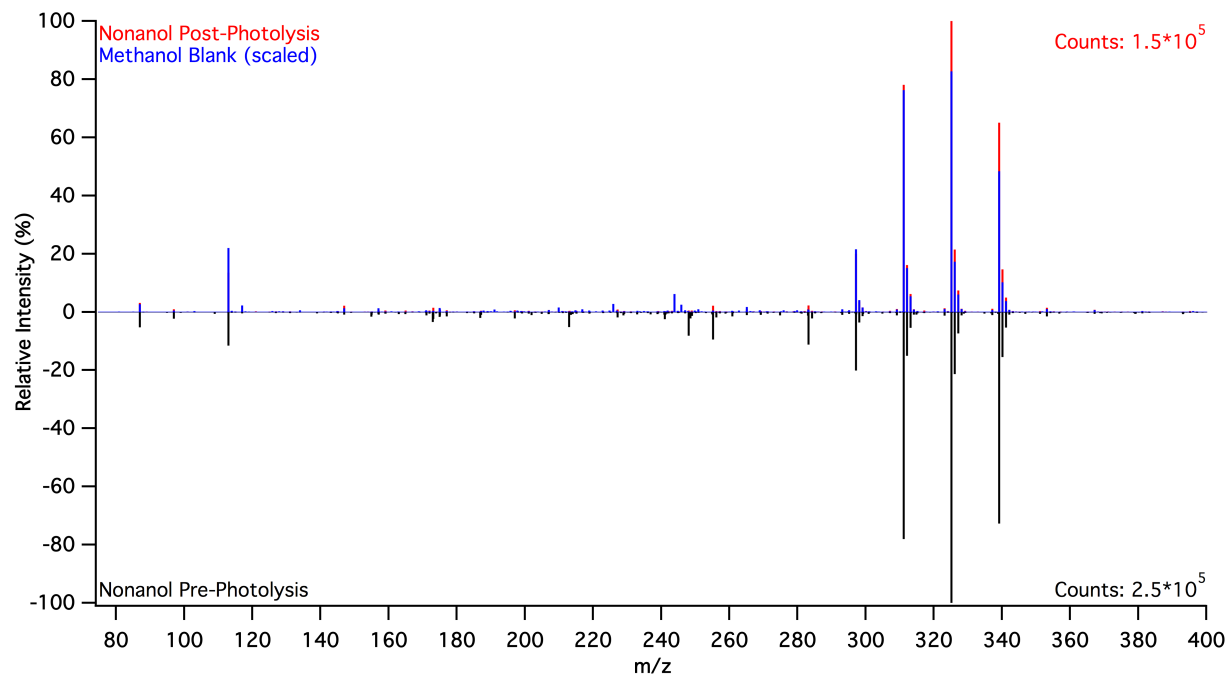

**Figure S8.** Representative ESI<sup>-</sup> MS of 0.9 mM nonanol solutions before (black, multiplied by -1 for ease of presentation), after 5 hours of photolysis (red), and the corresponding methanol blank (blue). Essentially all of the signal observed is due to species that are also present in the methanol blank.

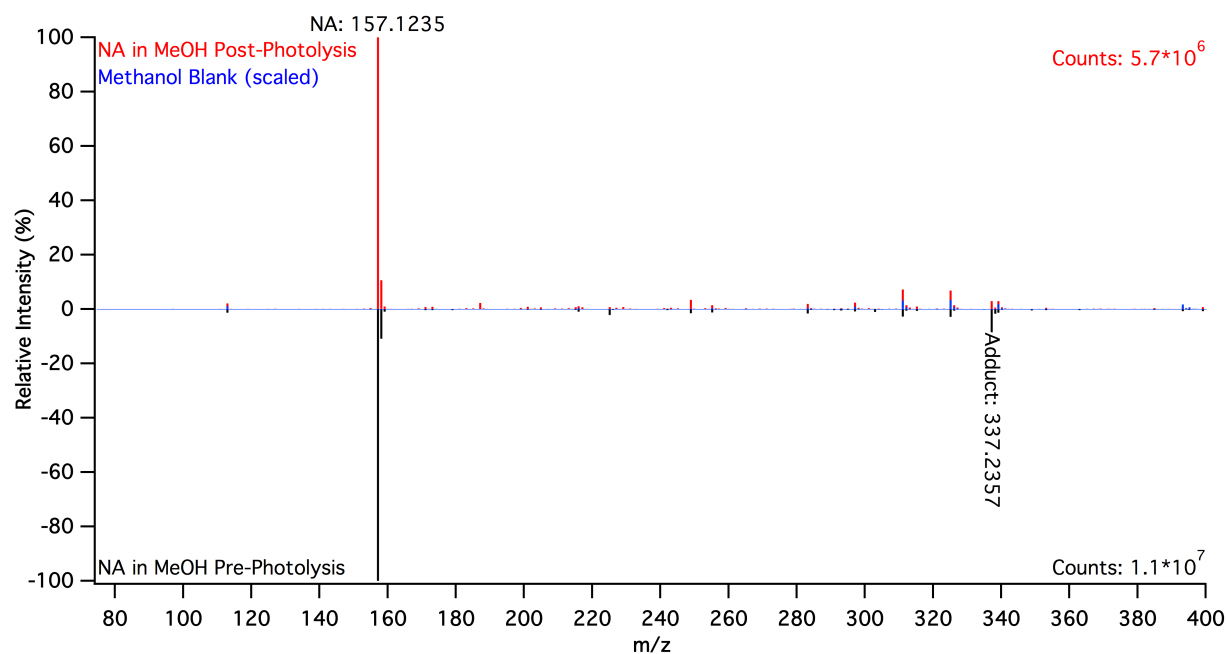

**Figure S9.** Representative ESI<sup>-</sup> MS of 100 mM nonanoic acid dissolved in methanol before (black, multiplied by -1 for ease of presentation), after 5 hours of photolysis (red), and the corresponding methanol blank (blue). There is essentially no difference between the two samples.

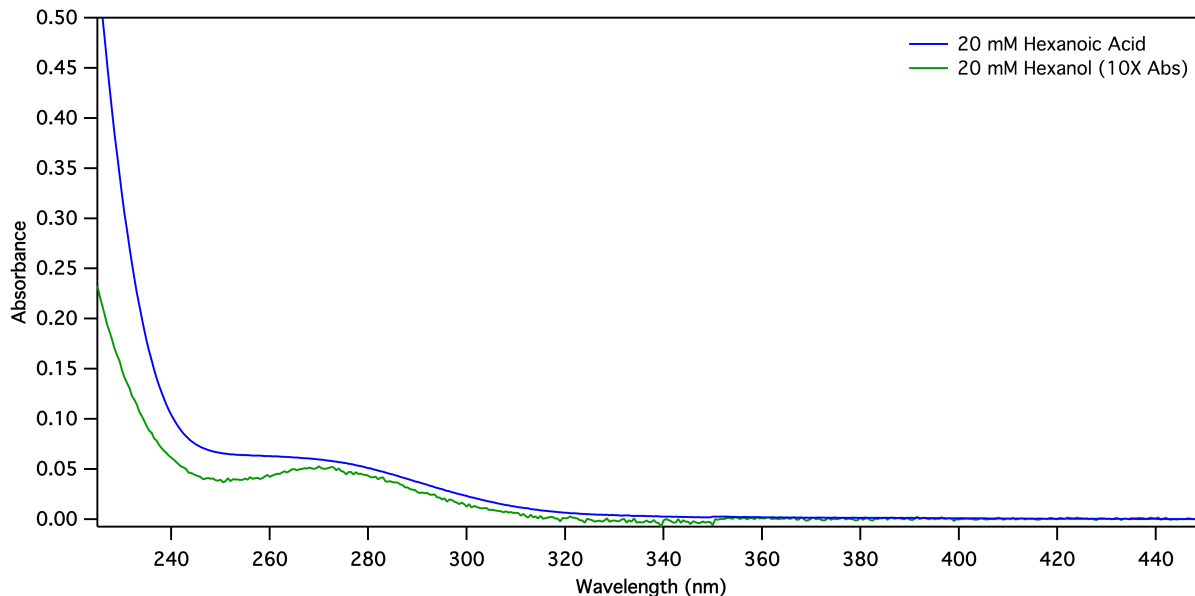

**Figure S10.** Representative UV-vis absorption spectra of 20 mM hexanoic acid (blue) and 20 mM hexanol (green). The absorbance of hexanol has been multiplied by 10 for clarity.

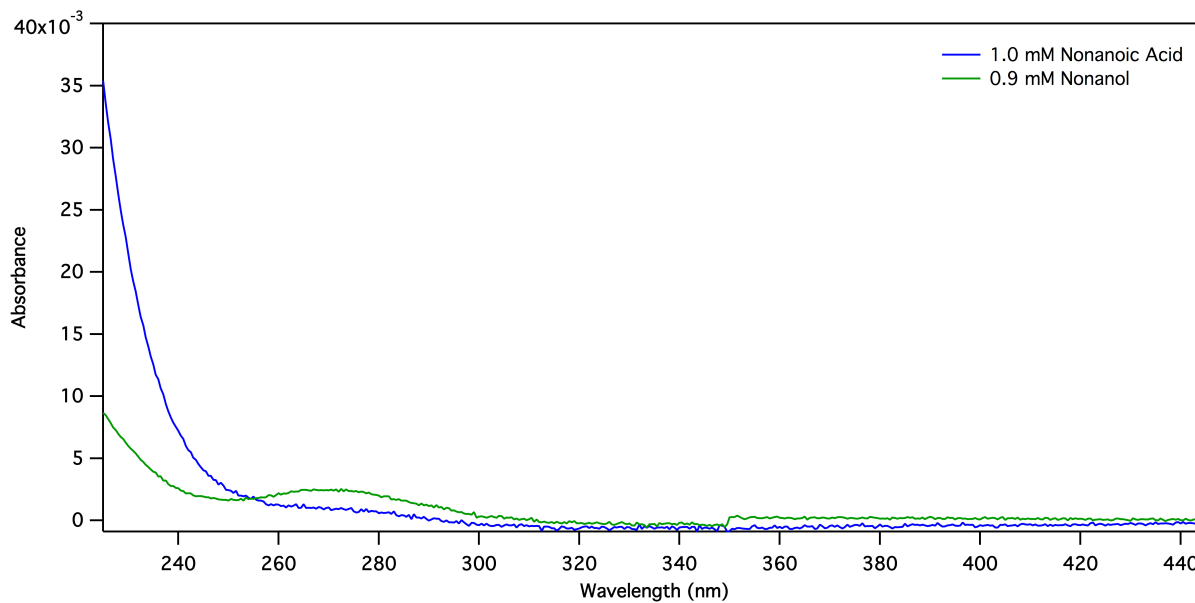

**Figure S11.** Representative UV-vis absorption spectra of 1 mM nonanoic acid (blue) and 0.9 mM nonanol (green).

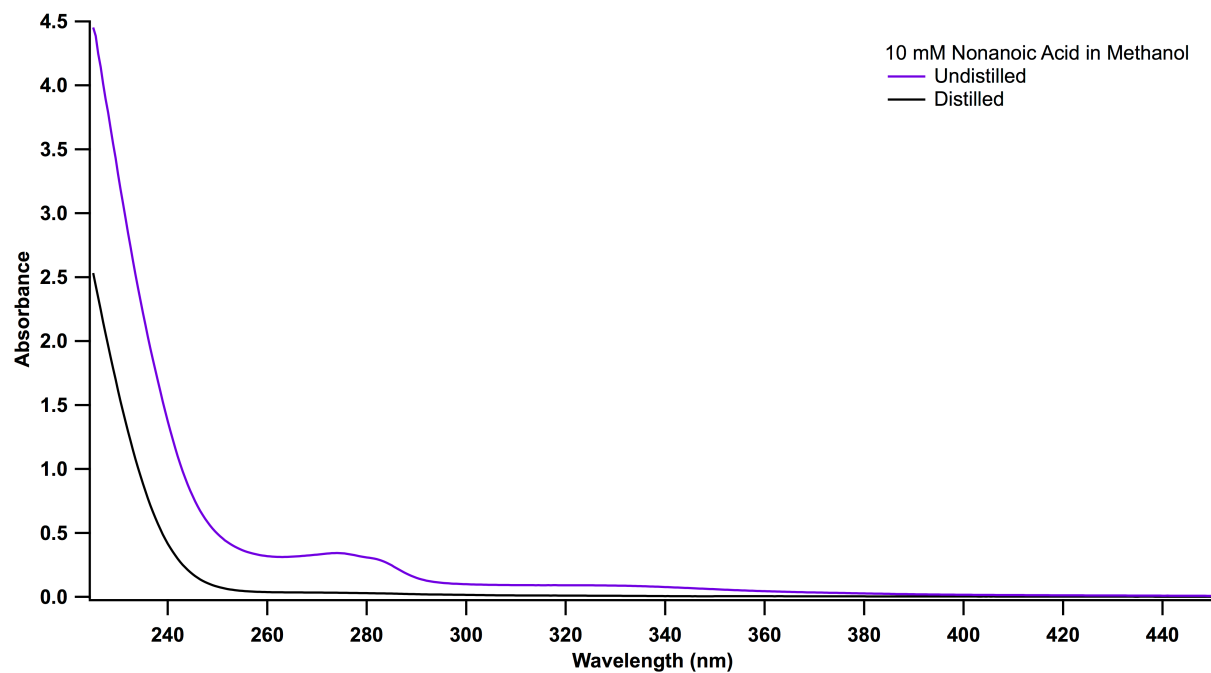

**Figure S12.** Representative UV-vis absorption spectra of 10 mM nonanoic acid dissolved in methanol before (purple) and after (black) distillation.

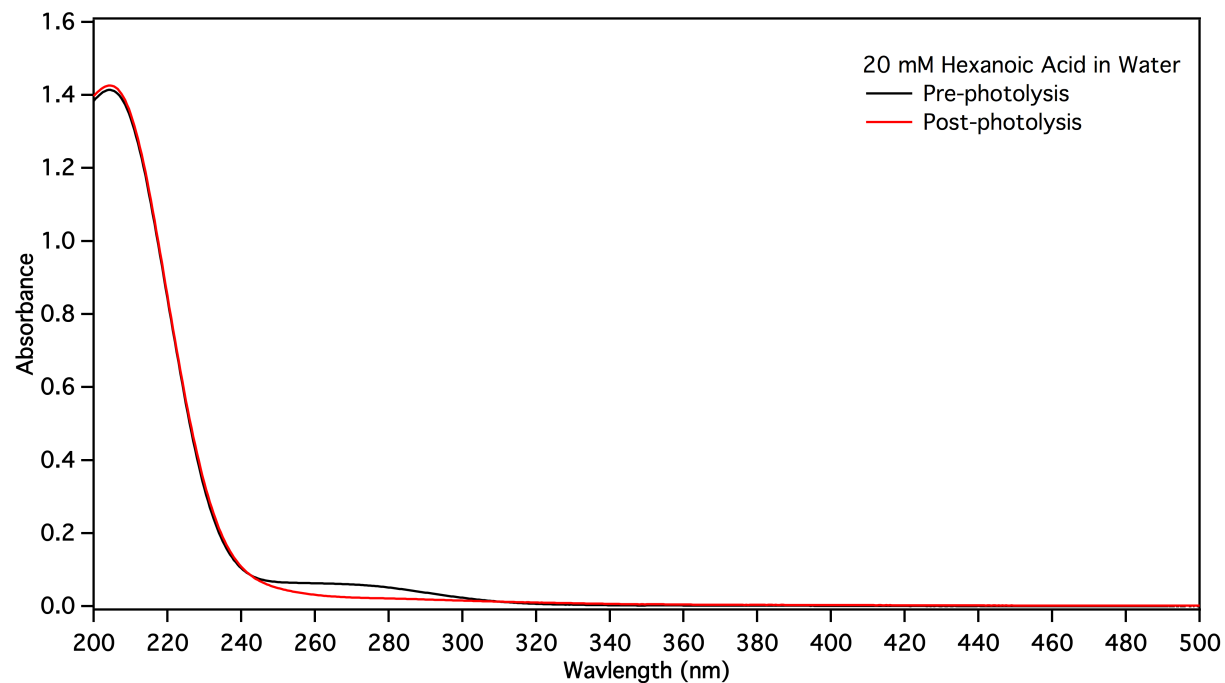

**Figure S13.** UV-vis spectra of distilled 20 mM hexanoic acid before (black) and after (red) 5 hours photolysis.

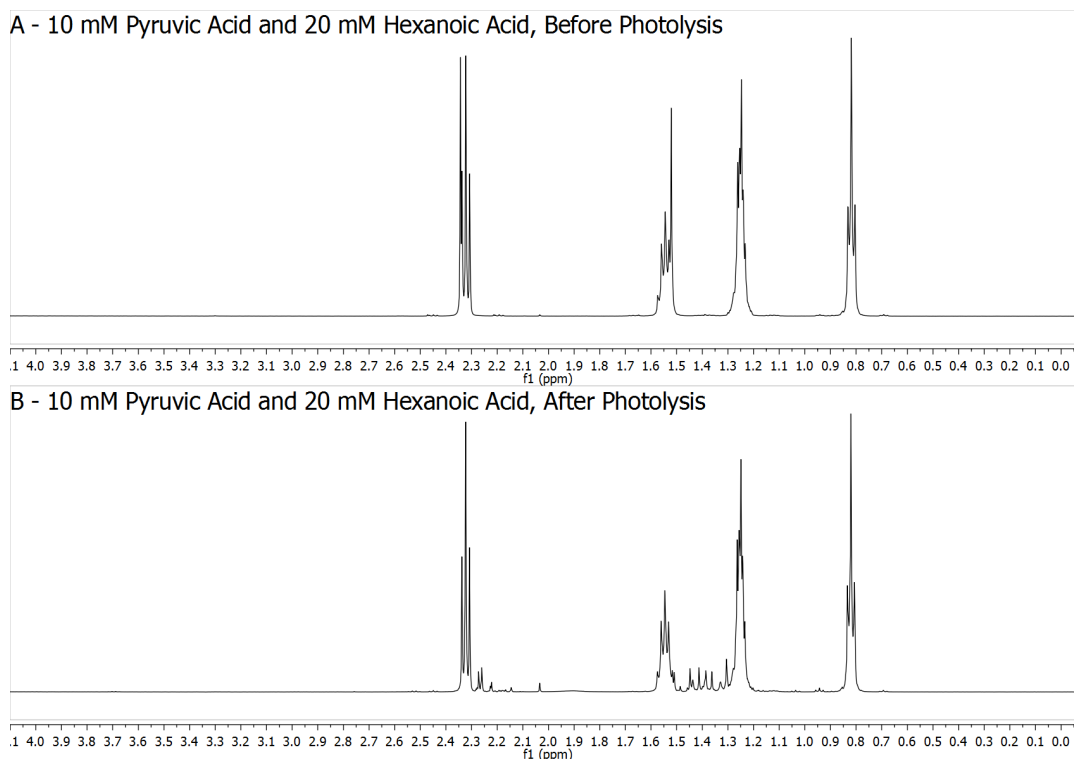

**Figure S14.** Representative NMR spectra of 10 mM pyruvic acid and 20 mM hexanoic acid before (A) and after (B) 5 hours of photolysis.

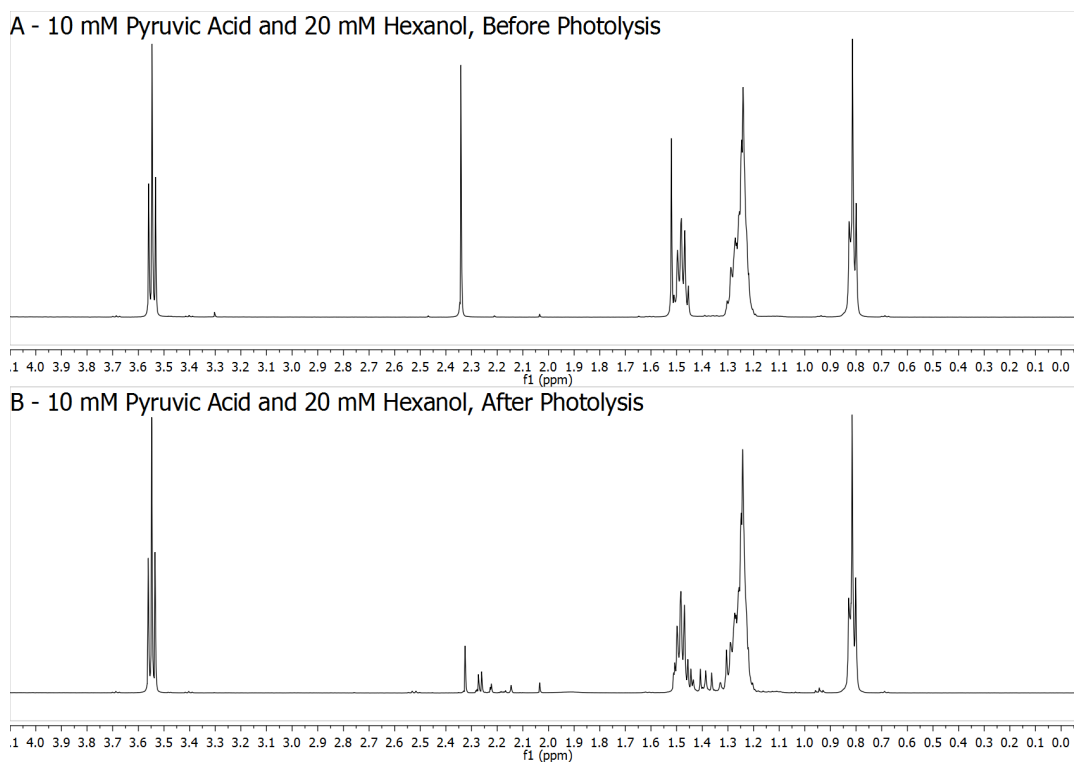

**Figure S15.** Representative NMR spectra of 10 mM pyruvic acid and 20 mM hexanol before (A) and after (B) 5 hours of photolysis.

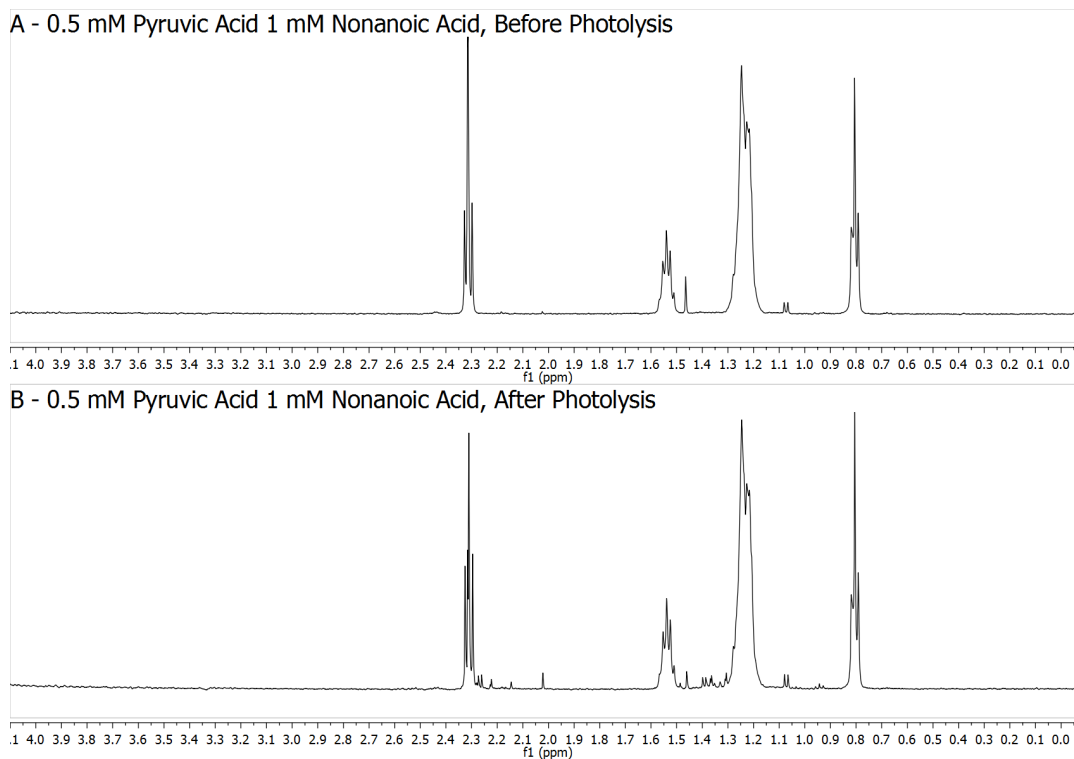

**Figure S16.** Representative NMR spectra of 0.5 mM pyruvic acid and 1 mM nonanoic acid before (A) and after (B) 5 hours of photolysis.

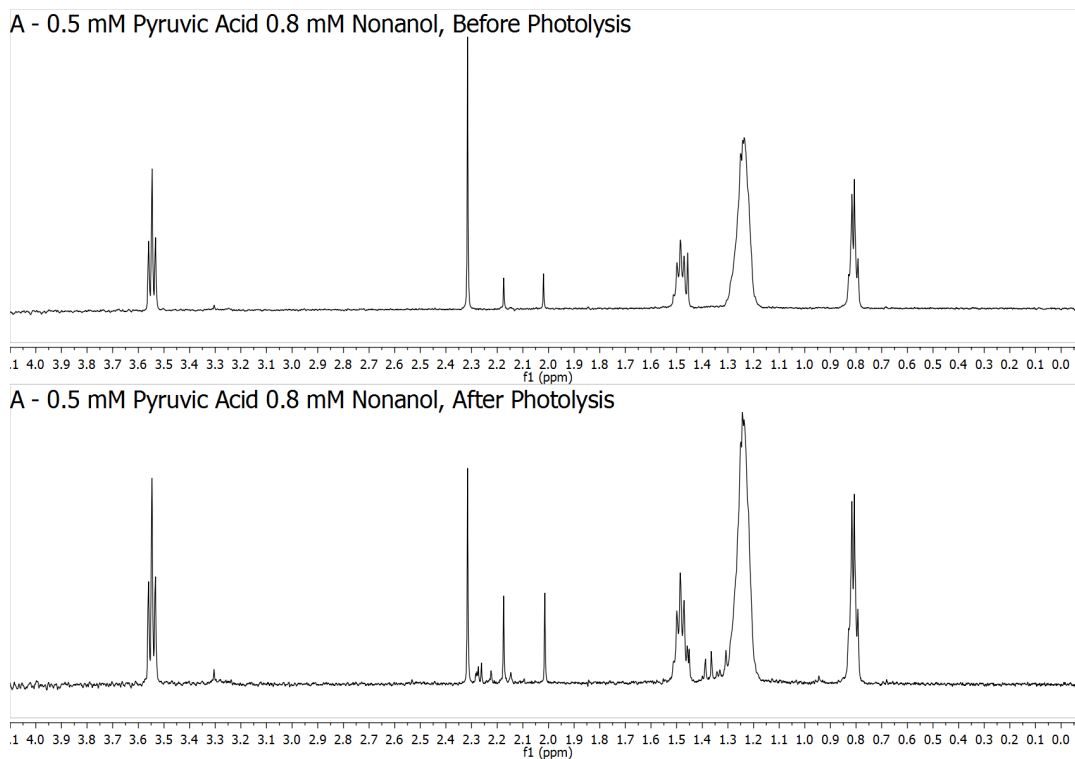

**Figure S17.** Representative NMR spectra of 0.5 mM pyruvic acid and 0.8 mM nonanol before (A) and after (B) 5 hours of photolysis.

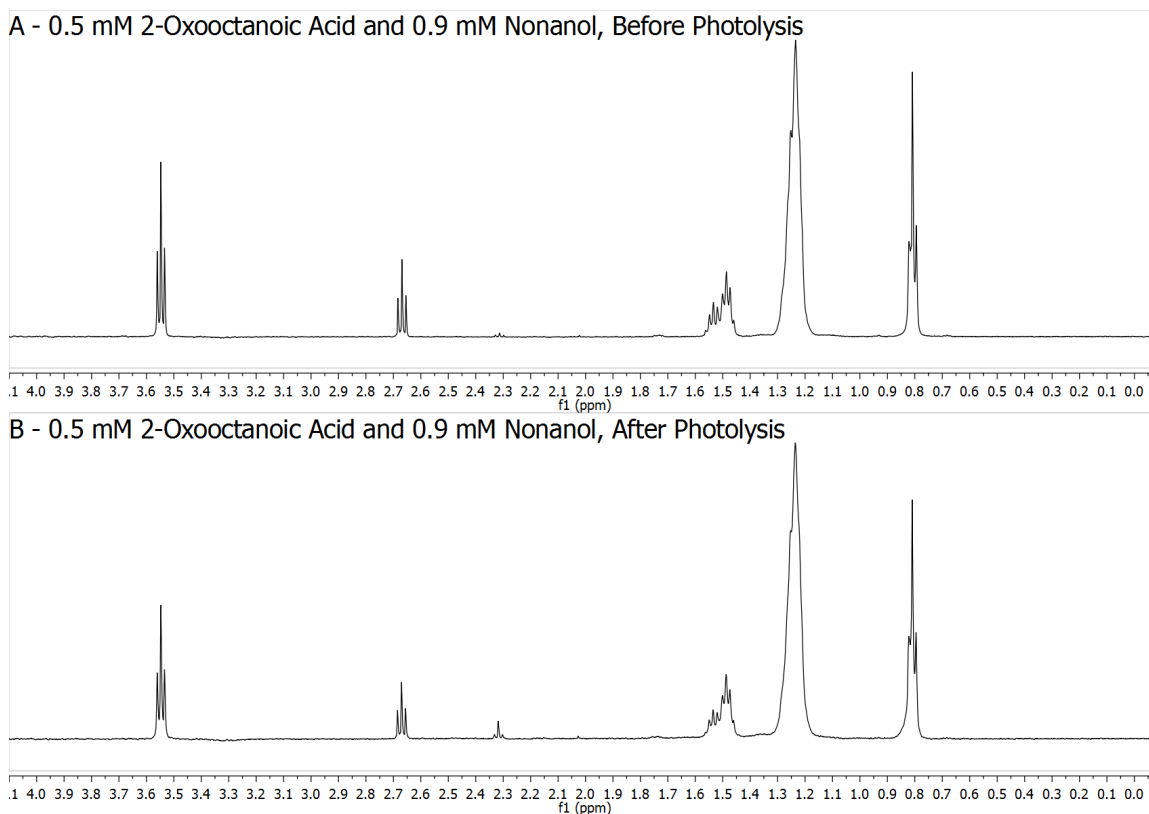

**Figure S18.** Representative NMR spectra of 0.5 mM 2-oxooctanoic acid and 0.9 mM nonanol before (A) and after (B) 5 hours of photolysis.

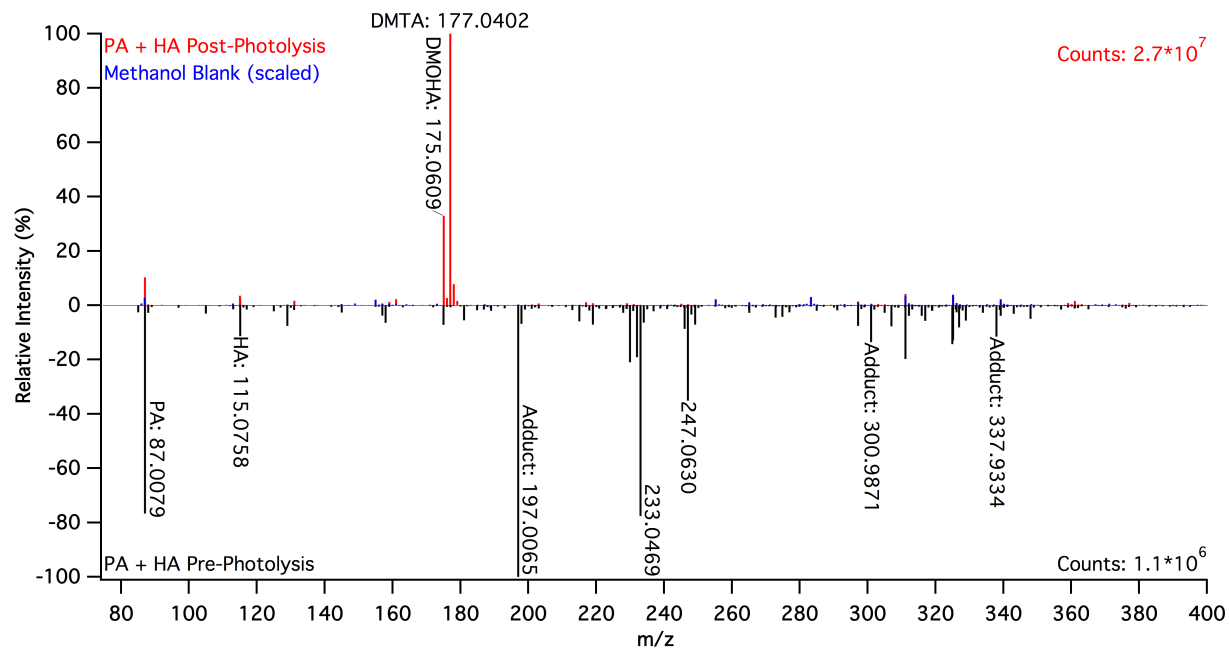

**Figure S19.** Representative ESI<sup>-</sup> MS of a solution of 10 mM pyruvic acid and 20 mM hexanoic acid before (black, multiplied by -1 for ease of presentation), after 5 hours of photolysis (red), and the corresponding methanol blank (blue).

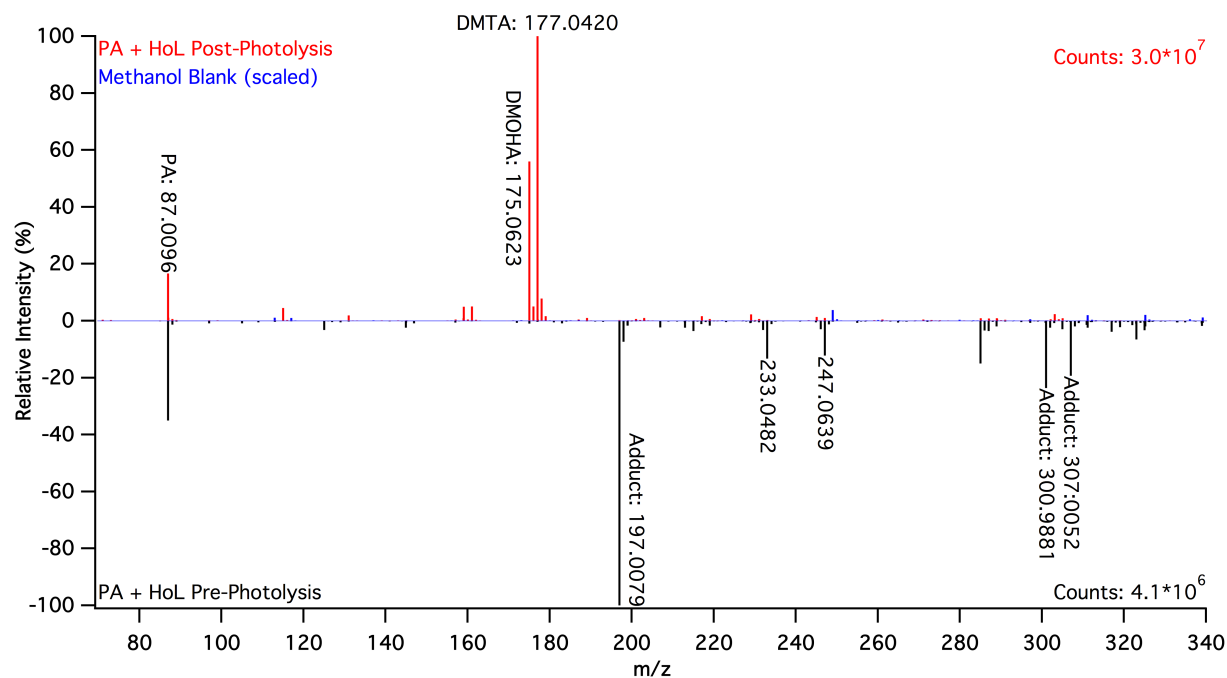

**Figure S20.** Representative ESI<sup>-</sup> MS of a solution of 10 mM pyruvic acid and 20 mM hexanol before (black, multiplied by -1 for ease of presentation), after 5 hours of photolysis (red), and the corresponding methanol blank (blue).

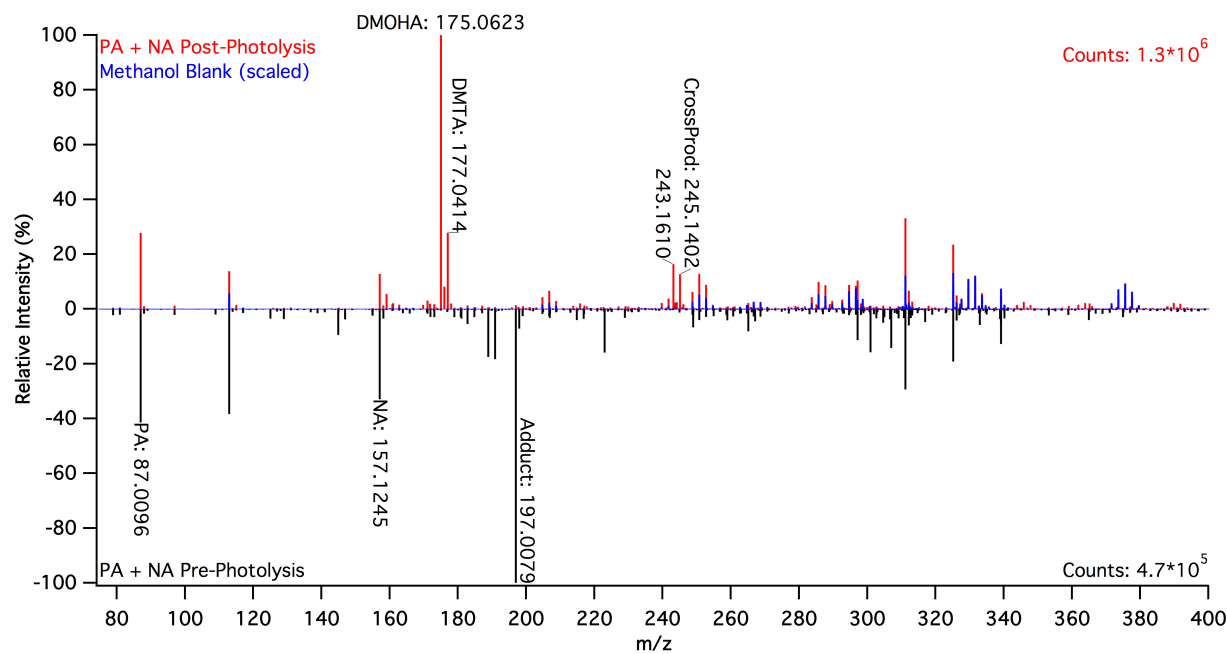

**Figure S21.** Representative ESI<sup>-</sup> MS of a solution of 0.5 mM pyruvic acid and 1 mM nonanoic acid before (black, multiplied by -1 for ease of presentation), after 5 hours of photolysis (red), and the corresponding methanol blank (blue).

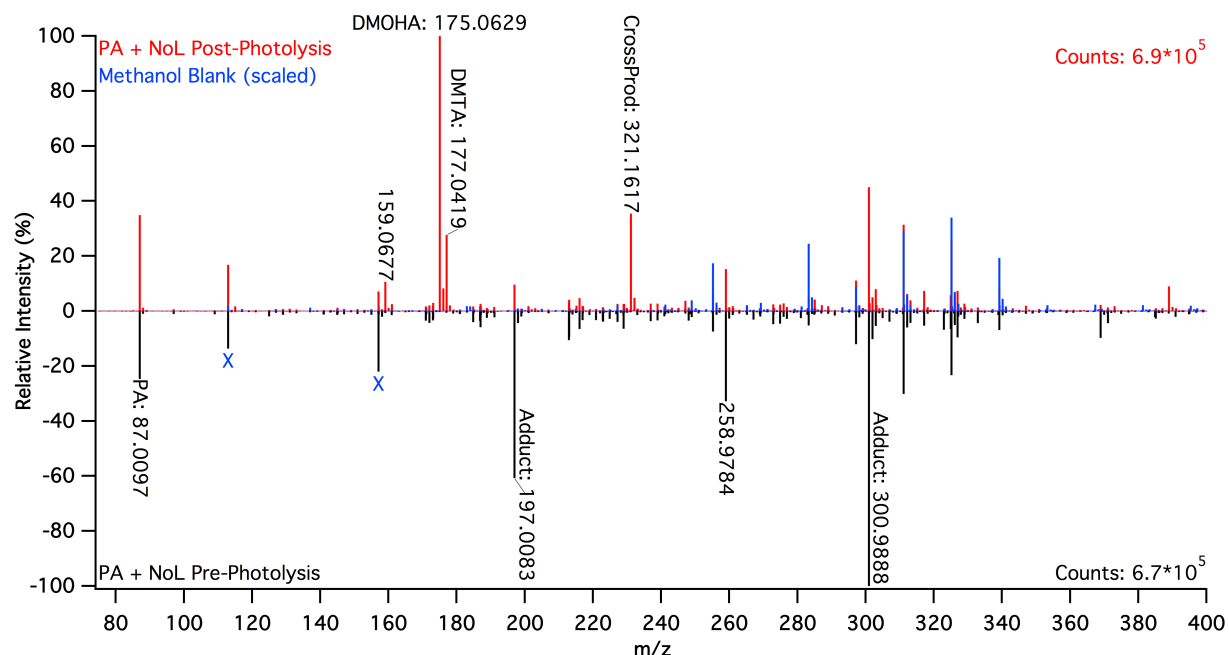

**Figure S22.** Representative ESI<sup>-</sup> MS of a solution of 0.5 mM pyruvic acid and 0.8 mM nonanol before (black, multiplied by -1 for ease of presentation), after 5 hours of photolysis (red), and the corresponding methanol blank (blue). Blue X's indicate signal due to carry-over of material from previous experimental samples.

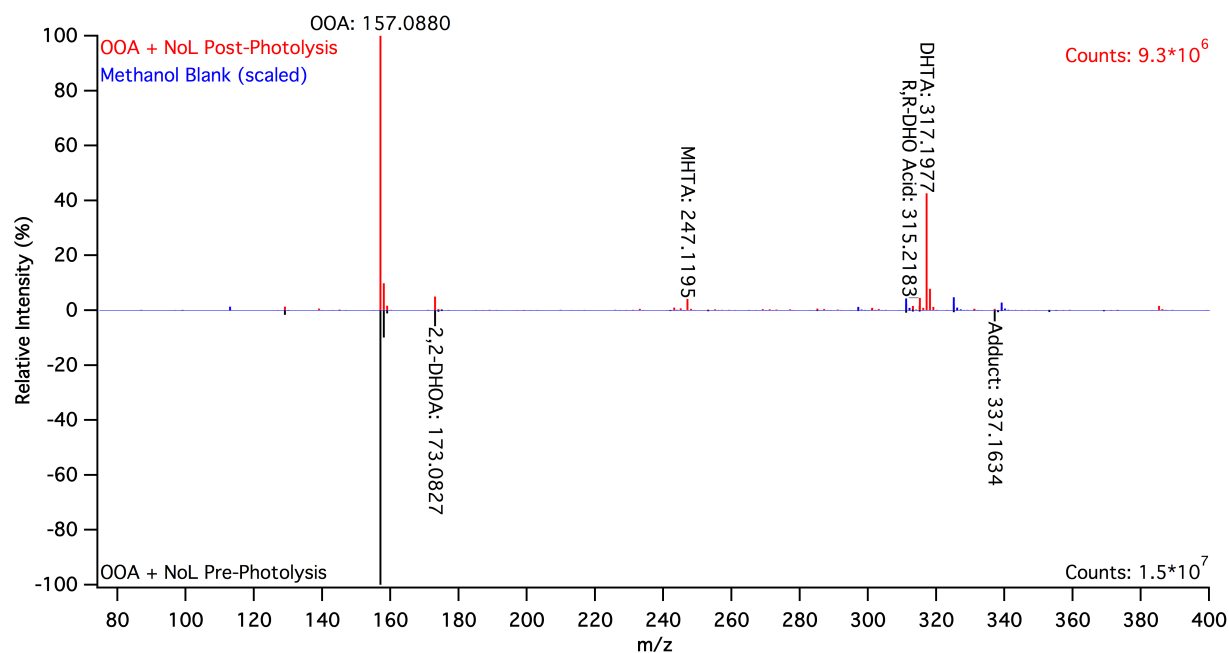

**Figure S23.** Representative ESI<sup>-</sup> MS of a solution of 0.5 mM 2-oxooctanoic acid and 0.9 mM nonanol before (black, multiplied by -1 for ease of presentation) and after 5 hours of photolysis (red).



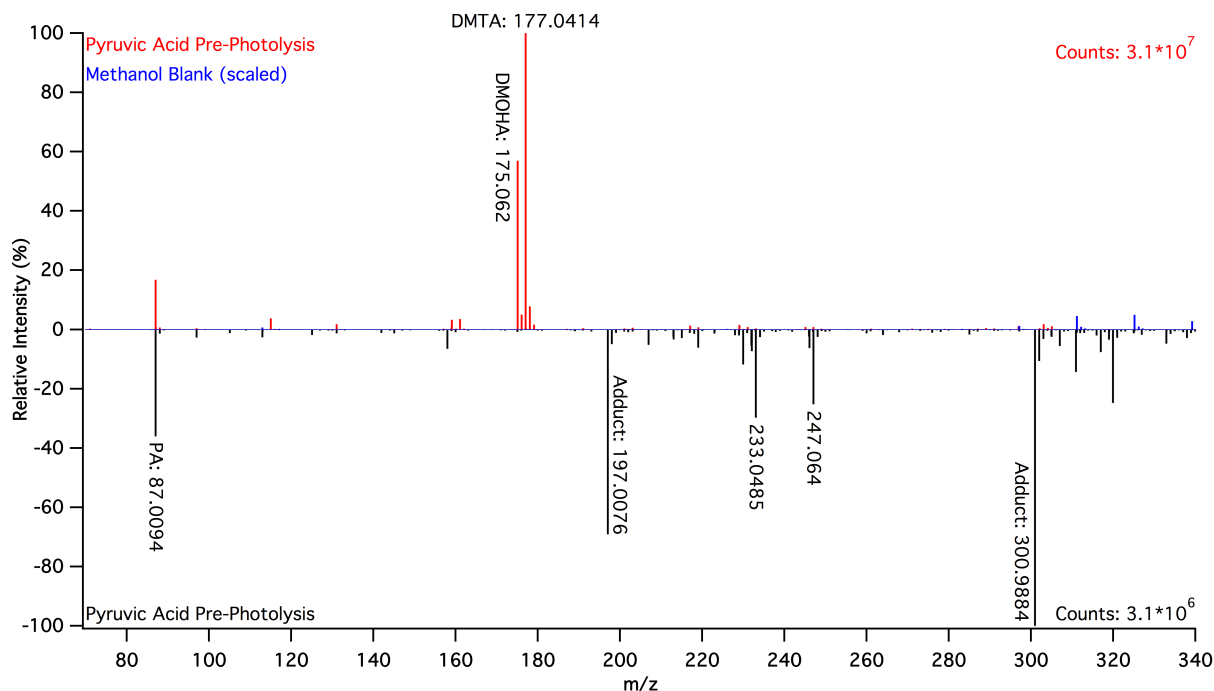

**Figure S24.** Representative ESI<sup>-</sup> MS of a solution of 10 mM pyruvic acid before (black, multiplied by -1 for ease of presentation), after 5 hours of photolysis (red), and the corresponding methanol blank (blue).

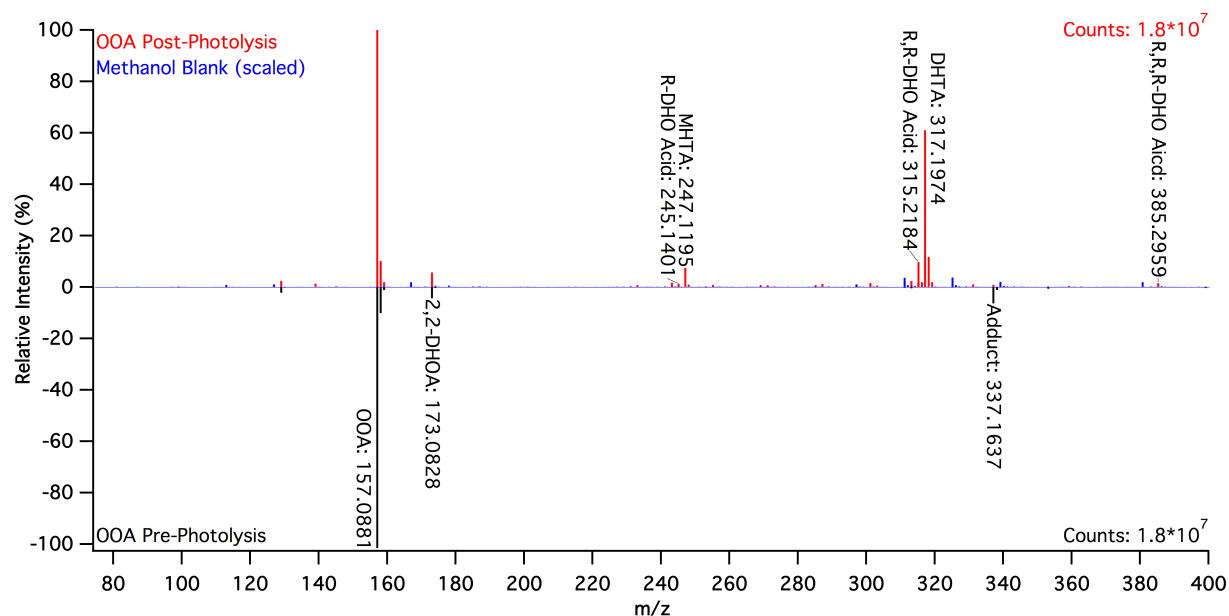

**Figure S25.** Representative ESI<sup>-</sup> MS of a solution of 0.5 mM 2-oxocotanoic acid before (black, multiplied by -1 for ease of presentation), after 5 hours of photolysis (red), and the corresponding methanol blank (blue). Product species are labeled following the conventions of Rapf, et al. 2017<sup>1</sup> and consist of two tartaric acid derivatives, dihexyltartaric acid (DHTA) and methylhexyltartaric acid (MHTA), as well as three dihydroxyoxoalkanoic acid species with between one and three alkyl tails (R-DHO acid, R,R-DHO acid, and R,R,R-DHO acid).

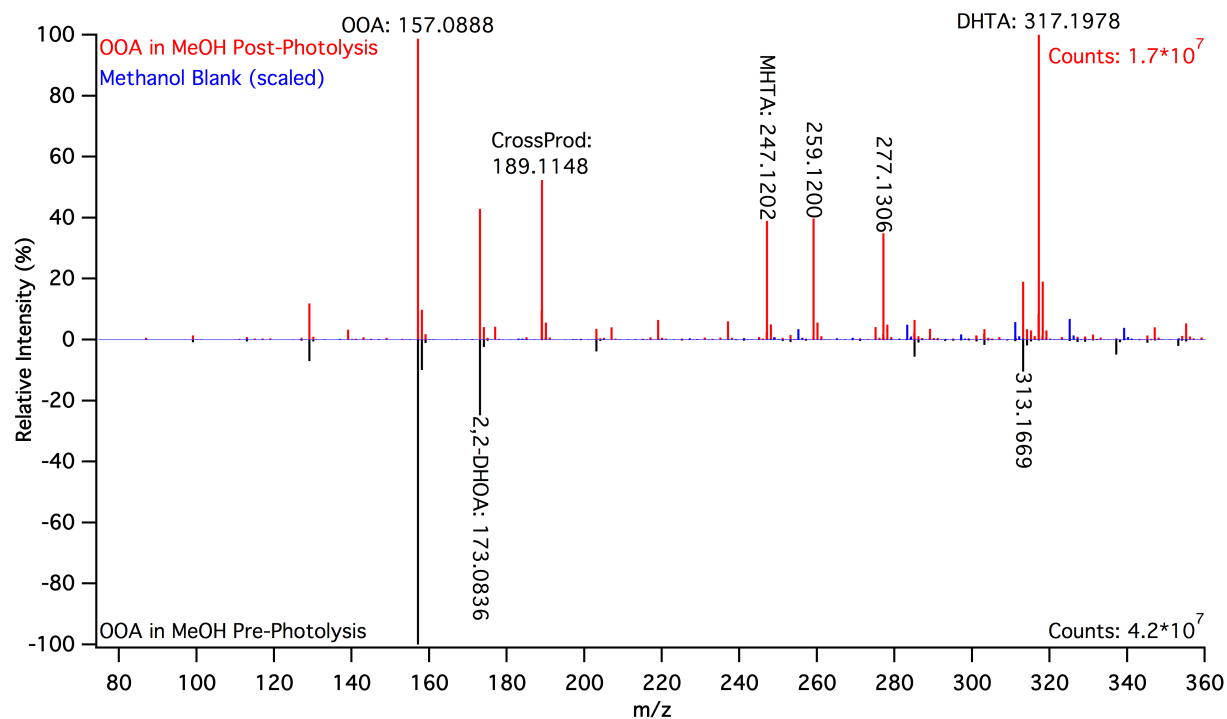

**Figure S26.** Representative ESI<sup>-</sup> MS of 6 mM 2-oxooctanoic acid dissolved in methanol before (black, multiplied by -1 for ease of presentation), after 5 hours of photolysis (red), and the corresponding methanol blank (blue).

#### Analytical Techniques and Instrument Parameters:

**UV-Vis Spectroscopy:** A Varian (Agilent) Cary 5000 spectrometer with a 0.1 s average time, 0.5 nm data interval, and a spectral bandwidth of either 0.5 nm or 1 nm was used for both pre- and post-photolysis solutions of the  $\alpha$ -keto acids.

**NMR Analysis:** <sup>1</sup>H NMR experiments were obtained using a Varian INOVA-500 NMR spectrometer operating at 499.60 MHz at 23 °C. In aqueous solution, experiments were performed using an optimized WET solvent suppression pulse sequence to eliminate >99% of the H<sub>2</sub>O signal.<sup>2</sup>

**Mass Spectrometry:** A Waters Synapt G2 HDMS mass spectrometer was used to collect high resolution mass spectrometry data using electrospray ionization operated in negative mode. Instrument parameters were as follows: analyzer, resolution mode; capillary voltage, 1.5 kV; source temperature, 80 °C; sampling cone, 30 V; extraction cone, 5 V; source gas flow, 0.00 mL/min; desolvation temperature, 150 °C; cone gas flow, 0.0 L/h; desolvation gas flow, 500.0 L/h. These parameters were chosen to minimize the potential for in-source fragmentation and reactions due to ionization and were held constant for all experiments.

Analyte intensities may not correlate directly to absolute concentrations and are used only for relative comparison. A conservative intensity threshold of 10<sup>4</sup> counts was applied for analyte identification to avoid incorrect ion assignments to noise peaks; the noise threshold is about 1000 counts. For comparative purposes, categories of signal intensity are defined as follows: “strong” ions display intensities greater than 10<sup>6</sup> counts, “medium” ions display intensities greater than 10<sup>5</sup> counts, and “weak” ions display intensities greater than 10<sup>4</sup> counts for the monoisotopic ion in all cases.

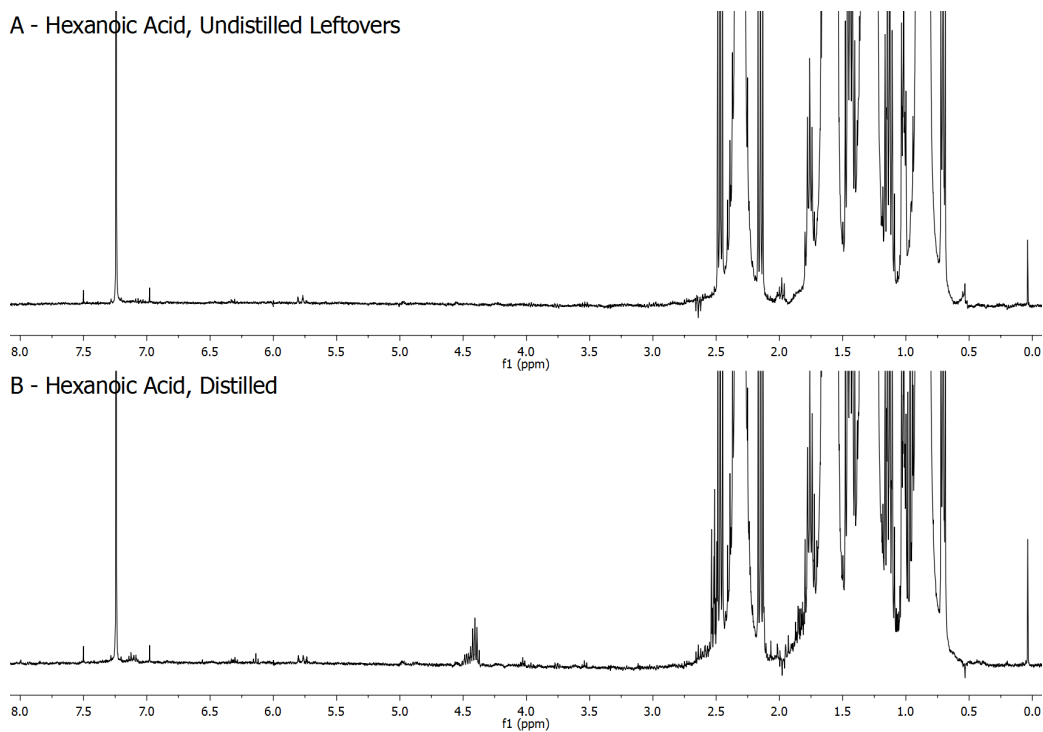

**Figure S27.** Representative NMR spectra of hexanoic acid after (B) distillation compared to the remnant material that was left over following distillation (A). Little change was observed upon distillation due to the starting purity of  $>99.5\%$  for hexanoic acid.

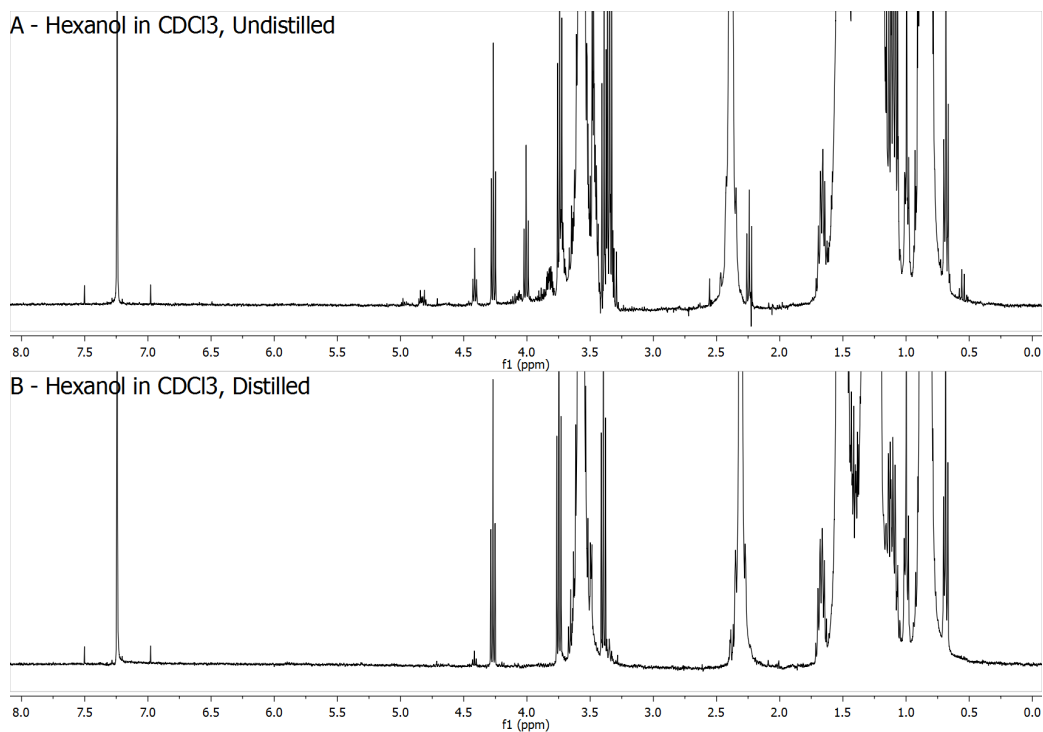

**Figure S28.** Representative NMR spectra of 1-hexanol before (A) and after (B) distillation.

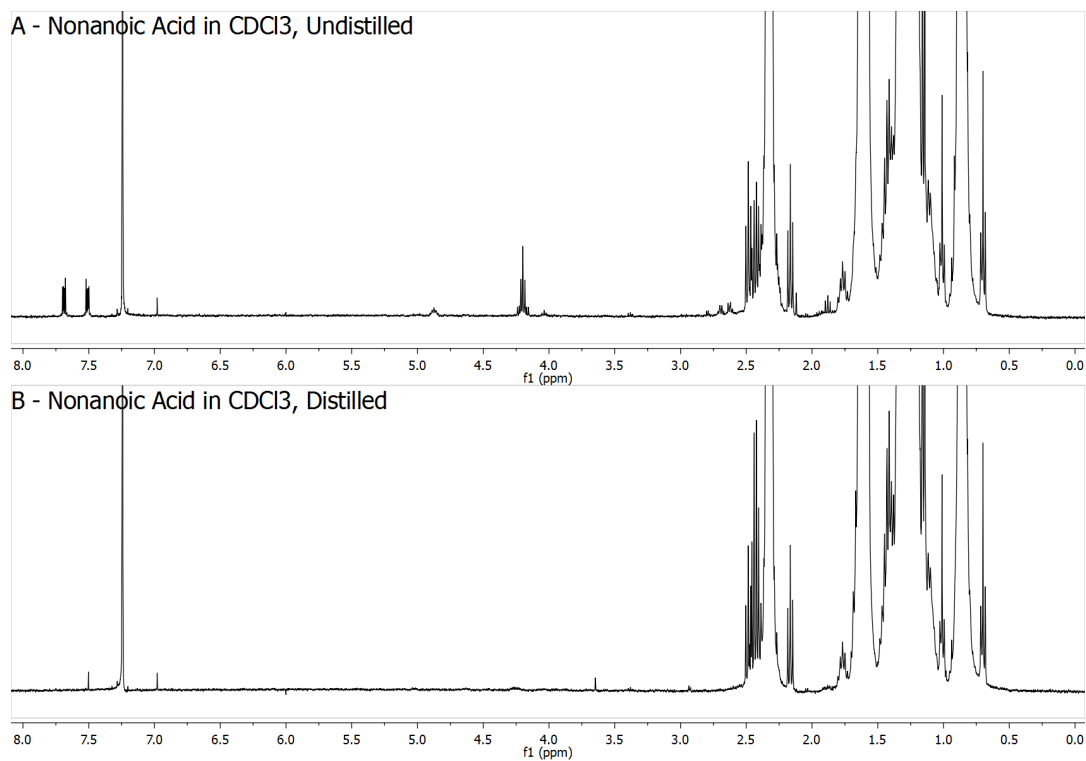

**Figure S29.** Representative NMR spectra of nonanoic acid before (A) and after (B) distillation.

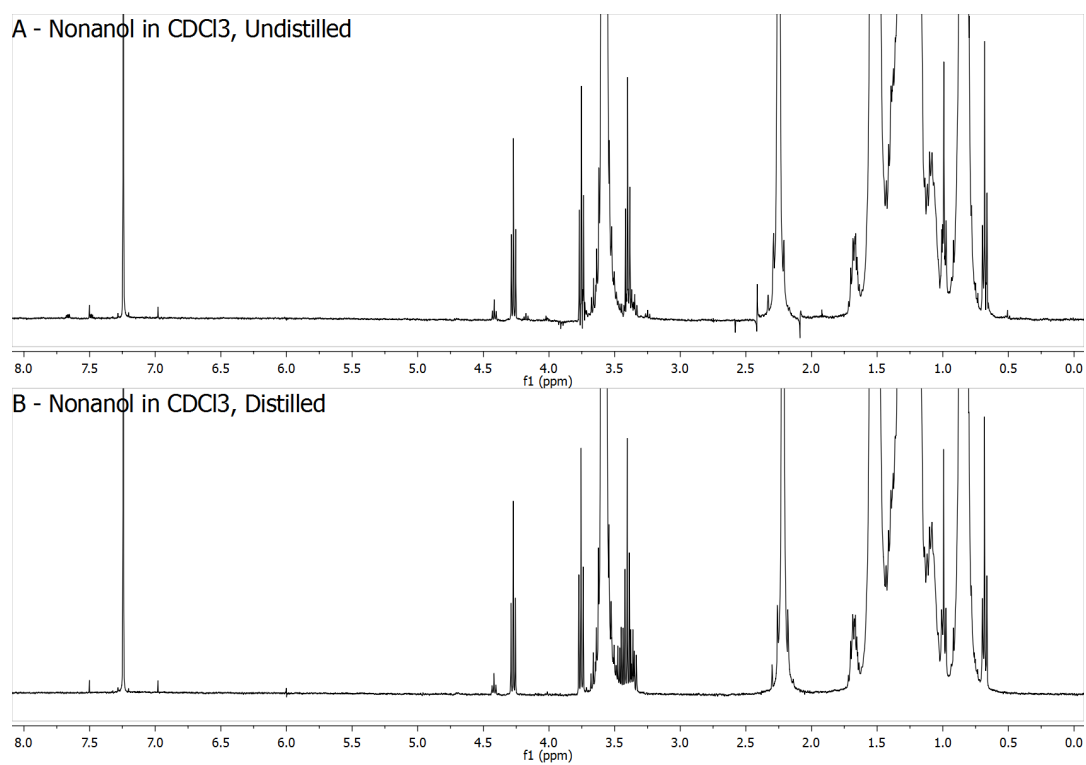

**Figure S30.** Representative NMR spectra of nonanol before (A) and after (B) distillation.

**Table S1.** Compiled ESI<sup>-</sup> MS Data for Pyruvic Acid and Hexanoic Acid

| Assigned Formula<br>[M-H] <sup>-</sup>                        | Assigned Structure         | Theor. m/z | Avg. Exp. m/z (ppm) | Pyruvic Acid |         | Hexanoic Acid |         | Mixed PA + HA |         |
|---------------------------------------------------------------|----------------------------|------------|---------------------|--------------|---------|---------------|---------|---------------|---------|
|                                                               |                            |            |                     | Pre-hv       | Post-hv | Pre-hv        | Post-hv | Pre-hv        | Post-hv |
| C <sub>3</sub> H <sub>3</sub> O <sub>3</sub> <sup>-</sup>     | Pyruvic Acid               | 87.0088    | 87.0088 (0.4)       | S            | S       |               |         | S             | S       |
| C <sub>4</sub> H <sub>7</sub> O <sub>2</sub> <sup>-</sup>     | Acetoin                    | 87.0452    | 87.0452 (0.4)       |              | M       |               |         |               | M       |
| C <sub>3</sub> H <sub>5</sub> O <sub>3</sub> <sup>-</sup>     | Lactic Acid                | 89.0244    | 89.0239 (-5.6)      |              | W       |               |         |               | W       |
| C <sub>3</sub> H <sub>5</sub> O <sub>4</sub> <sup>-</sup>     | 2,2-DHPA                   | 105.0193   | 105.0192 (-1.3)     | W            |         |               |         | W             |         |
| C <sub>5</sub> H <sub>7</sub> O <sub>3</sub> <sup>-</sup>     | Unassigned                 | 115.0401   | 115.0403 (1.6)      |              | M       |               |         |               | M       |
| C <sub>6</sub> H <sub>11</sub> O <sub>2</sub> <sup>-</sup>    | Hexanoic Acid              | 115.0765   | 115.0768 (3.4)      |              |         | M             | M       | M             | M       |
| C <sub>5</sub> H <sub>7</sub> O <sub>4</sub> <sup>-</sup>     | Acetolactic Acid           | 131.0350   | 131.0353 (2.7)      |              | M       |               |         |               | M       |
| C <sub>8</sub> H <sub>13</sub> O <sub>3</sub> <sup>-</sup>    | Unassigned                 | 157.0870   | 157.0876 (3.5)      |              |         |               |         |               | W       |
| C <sub>7</sub> H <sub>11</sub> O <sub>4</sub> <sup>-</sup>    | Unassigned                 | 159.0663   | 159.0665 (3.4)      |              | M       |               |         |               | M       |
| C <sub>6</sub> H <sub>9</sub> O <sub>5</sub> <sup>-</sup>     | Unassigned                 | 161.0455   | 161.0461 (3.4)      |              | M       |               |         |               | M       |
| Unidentified                                                  |                            |            | 174.9569 ± 0.0001   |              |         | M             | M       |               |         |
| C <sub>6</sub> H <sub>7</sub> O <sub>6</sub> <sup>-</sup>     | Parapyruvic Acid*          | 175.0248   | 175.0239 (-5.4)     | W            |         |               |         |               |         |
| C <sub>7</sub> H <sub>11</sub> O <sub>5</sub> <sup>-</sup>    | DMOHA                      | 175.0612   | 175.0614 (1.1)      |              | S       |               |         |               | S       |
| C <sub>6</sub> H <sub>9</sub> O <sub>6</sub> <sup>-</sup>     | Dimethyltartaric Acid      | 177.0405   | 177.0408 (2.2)      |              | S       |               |         |               | S       |
| Unidentified                                                  |                            |            | 183.0647 ± 0.0001   |              |         | M             | M       |               | W       |
| Unidentified                                                  |                            |            | 185.1189 ± 0.0005   |              |         |               |         |               | W       |
| C <sub>6</sub> H <sub>6</sub> O <sub>6</sub> Na <sup>-</sup>  | Na Adduct of 2 PA-         | 197.0068   | 197.0073 (2.6)      | S            | W       |               |         | S             | W       |
| C <sub>9</sub> H <sub>15</sub> O <sub>5</sub> <sup>-</sup>    | Cross-product of PA and HA | 203.0925   | 203.0926 (0.5)      |              | W       |               |         |               | M       |
| Unidentified                                                  |                            |            | 217.0719 ± 0.0006   |              | M       |               |         |               | M       |
| C <sub>8</sub> H <sub>11</sub> O <sub>7</sub> <sup>-</sup>    | CDMOHA                     | 219.0510   | 219.0517 (3.1)      |              | M       |               |         |               | M       |
| C <sub>9</sub> H <sub>14</sub> O <sub>5</sub> Na <sup>-</sup> | Na Adduct of PA- and HA-   | 225.0744   | 225.0752 (3.4)      |              |         |               |         | W             | W       |
| C <sub>10</sub> H <sub>13</sub> O <sub>6</sub> <sup>-</sup>   | Unassigned                 | 229.0718   | 229.0721 (1.6)      |              | M       |               |         |               | M       |
| C <sub>9</sub> H <sub>11</sub> O <sub>7</sub> <sup>-</sup>    | Unassigned                 | 231.0510   | 231.0518 (3.1)      |              | M       |               |         |               | M       |

|                         |                                   |          |                      |   |   |   |   |  |   |   |
|-------------------------|-----------------------------------|----------|----------------------|---|---|---|---|--|---|---|
| $C_{10}H_{15}O_6^-$     | Unassigned                        | 231.0874 | 231.0876<br>(0.9)    |   | M |   |   |  |   | M |
| Unidentified            |                                   |          | 233.0473 ±<br>0.0007 | M |   |   |   |  | M |   |
| Unidentified            |                                   |          | 245.0350 ±<br>0.0000 |   |   | M | M |  |   | W |
| Unidentified            |                                   |          | 247.0632 ±<br>0.0004 | S |   |   |   |  | M |   |
| $C_{12}H_{22}O_4Na^-$   | Na Adduct of<br>HA-               | 253.1421 | 253.1430<br>(3.4)    |   |   | M | M |  | W | W |
| Unidentified            |                                   |          | 269.0014 ±<br>0.0001 |   |   | M | M |  |   |   |
| $C_{10}H_{14}O_8Na^-$   | Na Adduct of<br>PA- and<br>DMOHA- | 285.0592 | 285.0598<br>(2.0)    |   | M |   |   |  |   | W |
| $C_9H_{12}O_9Na^-$      | Na Adduct of<br>PA- and DMTA-     | 287.0384 | 287.0385<br>(0.2)    |   | W |   |   |  |   | W |
| $C_9H_9O_9Ca^-$         | Ca Adduct of 3<br>PA-             | 300.9878 | 300.9877<br>(-0.2)   | M |   |   |   |  | M |   |
| $C_9H_9O_9Na_2^-$       | Na Adduct of 3<br>PA-             | 307.0047 | 307.0048<br>(0.1)    | M |   |   |   |  | M |   |
| Unidentified            |                                   |          | 313.0218 ±<br>0.0001 |   |   | M | M |  |   |   |
| $C_{12}H_{20}O_8Na^-$   | Na Adduct of<br>DMTA- and HA-     | 315.1061 | 315.1073<br>(3.5)    |   |   |   |   |  | W | W |
| Unidentified            |                                   |          | 315.1124 ±<br>0.0001 |   |   | M | M |  |   |   |
| Unidentified            |                                   |          | 383.0997 ±<br>0.0001 |   |   | M | M |  |   |   |
| $C_{18}H_{33}O_6Ca^-$   | Ca Adduct of 3<br>HA-             | 385.1908 | 385.1906<br>(-0.6)   |   |   | M | M |  |   |   |
| $C_{18}H_{33}O_6Na_2^-$ | Na Adduct of 3<br>HA-             | 391.2078 | 391.2077<br>(-0.3)   |   |   | W | W |  |   |   |

Notes: Chemical formulas are assigned as the ionized  $[M-H]^-$  species, structures are assigned as the neutral species. The theoretical m/z for each species is given, where known. The experimental mass differences from this value were <15 ppm for each species assigned for each experiment, with typical values of <8 ppm. The experimental m/z and mass differences reported are average values combined across all experiments in which the analyte was detected. Where the peak has not been assigned, the average m/z value across experiments is given, with uncertainties given as a 95% confidence interval.

S = Strong, M = Medium, W = Weak

Blank entries indicate that the species was not observed with an intensity above the cut-off threshold, which was set conservatively at  $10^4$  counts.

2,2-DHPA = 2,2-Dihydroxypropanoic Acid, diol of pyruvic acid

DMOHA = 2,4-dihydroxy-2-methyl-5-oxohexanoic acid

CDMOHA = 4-carboxy-2,4-dihydroxy 2-methyl-5-oxohexanoic acid

\*The peak assigned to parapyruvic acid likely also has contributions from the closed ring form of the zymonic acid diol as well.

**Table S2.** Compiled ESI<sup>-</sup> MS Data for Pyruvic Acid and Hexanol

| Assigned Formula [M-H] <sup>-</sup>                            | Assigned Structure          | Theor. m/z | Avg. Exp. m/z (ppm) | Pyruvic Acid |         | Hexanol |         | Mixed PA+HoL |         |
|----------------------------------------------------------------|-----------------------------|------------|---------------------|--------------|---------|---------|---------|--------------|---------|
|                                                                |                             |            |                     | Pre-hv       | Post-hv | Pre-hv  | Post-hv | Pre-hv       | Post-hv |
| C <sub>3</sub> H <sub>3</sub> O <sub>3</sub> <sup>-</sup>      | Pyruvic Acid                | 87.0088    | 87.0095 (8.7)       | S            | S       |         |         | S            | S       |
| C <sub>4</sub> H <sub>7</sub> O <sub>2</sub> <sup>-</sup>      | Acetoin                     | 87.0452    | 87.0454 (2.7)       |              | M       |         |         |              | M       |
| C <sub>3</sub> H <sub>5</sub> O <sub>3</sub> <sup>-</sup>      | Lactic Acid                 | 89.0244    | 89.0240 (-4.7)      |              | W       |         |         |              |         |
| C <sub>3</sub> H <sub>5</sub> O <sub>4</sub> <sup>-</sup>      | 2,2-DHPA                    | 105.0193   | 105.0197 (3.7)      | W            |         |         |         | W            |         |
| C <sub>5</sub> H <sub>7</sub> O <sub>3</sub> <sup>-</sup>      | Unassigned                  | 115.0401   | 115.0404 (3.1)      |              | M       |         |         |              | M       |
| C <sub>5</sub> H <sub>7</sub> O <sub>4</sub> <sup>-</sup>      | Acetolactic Acid            | 131.0350   | 131.0352 (2.0)      |              | M       |         |         |              | M       |
| C <sub>7</sub> H <sub>11</sub> O <sub>4</sub> <sup>-</sup>     | Unassigned                  | 159.0663   | 159.0668 (2.9)      |              | M       |         |         |              | M       |
| C <sub>6</sub> H <sub>9</sub> O <sub>6</sub> <sup>-</sup>      | Unassigned                  | 161.0455   | 161.0466 (6.3)      |              | M       |         |         |              | M       |
| C <sub>6</sub> H <sub>7</sub> O <sub>6</sub> <sup>-</sup>      | Parapyruvic Acid*           | 175.0248   | 175.0253 (3.0)      | W            |         |         |         |              |         |
| C <sub>7</sub> H <sub>11</sub> O <sub>5</sub> <sup>-</sup>     | DMOHA                       | 175.0612   | 175.0618 (3.4)      |              | S       |         |         |              | S       |
| C <sub>6</sub> H <sub>9</sub> O <sub>6</sub> <sup>-</sup>      | Dimethyltartaric Acid       | 177.0405   | 177.0411 (3.6)      |              | S       |         |         |              | S       |
| C <sub>9</sub> H <sub>17</sub> O <sub>4</sub> <sup>-</sup>     | Cross-product of PA and HoL | 189.1132   | 189.1143 (5.6)      |              |         |         |         |              | M       |
| C <sub>6</sub> H <sub>6</sub> O <sub>6</sub> Na <sup>-</sup>   | Na Adduct of 2 PA-          | 197.0068   | 197.0075 (3.8)      | S            | W       |         |         | S            | W       |
| Unidentified                                                   |                             |            | 217.0719 ± 0.0006   |              | M       |         |         |              | M       |
| C <sub>8</sub> H <sub>11</sub> O <sub>7</sub> <sup>-</sup>     | CDMOHA                      | 219.0510   | 219.0515 (2.2)      |              | M       |         |         |              | M       |
| C <sub>10</sub> H <sub>13</sub> O <sub>6</sub> <sup>-</sup>    | Unassigned                  | 229.0718   | 229.0726 (3.5)      |              | M       |         |         |              | M       |
| C <sub>9</sub> H <sub>11</sub> O <sub>7</sub> <sup>-</sup>     | Unassigned                  | 231.0510   | 231.0516 (2.4)      |              | M       |         |         |              | M       |
| C <sub>10</sub> H <sub>15</sub> O <sub>6</sub> <sup>-</sup>    | Unassigned                  | 231.0874   | 231.0876 (0.8)      |              | M       |         |         |              | M       |
| Unidentified                                                   |                             |            | 233.0473 ± 0.0007   | M            |         |         |         | M            |         |
| Unidentified                                                   |                             |            | 247.0632 ± 0.0004   | S            |         |         |         | M            |         |
| C <sub>10</sub> H <sub>14</sub> O <sub>8</sub> Na <sup>-</sup> | Na Adduct of PA- and DMOHA- | 285.0592   | 285.0597 (1.7)      |              | M       |         |         |              | W       |
| C <sub>9</sub> H <sub>12</sub> O <sub>9</sub> Na <sup>-</sup>  | Na Adduct of PA- and DMTA-  | 287.0384   | 287.0393 (2.9)      |              | W       |         |         |              | W       |

|                   |                    |          |                |   |  |  |  |   |   |
|-------------------|--------------------|----------|----------------|---|--|--|--|---|---|
| $C_9H_9O_9Ca^-$   | Ca Adduct of 3 PA- | 300.9878 | 300.9881 (1.1) | M |  |  |  | M | W |
| $C_9H_9O_9Na_2^-$ | Na Adduct of 3 PA- | 307.0047 | 307.0052 (1.5) | M |  |  |  | M |   |

**Table S3.** Compiled ESI<sup>-</sup> MS Data for Pyruvic Acid and Nonanoic Acid

|                                     |                             |            |                     | Pyruvic Acid |         | Nonanoic Acid |         | Mixed PA + NA |         |
|-------------------------------------|-----------------------------|------------|---------------------|--------------|---------|---------------|---------|---------------|---------|
| Assigned Formula [M-H] <sup>-</sup> | Assigned Structure          | Theor. m/z | Avg. Exp. m/z (ppm) | Pre-hv       | Post-hv | Pre-hv        | Post-hv | Pre-hv        | Post-hv |
| $C_3H_3O_3^-$                       | Pyruvic Acid                | 87.0088    | 87.0092 (5.0)       | M            | M       |               |         | M             | M       |
| $C_4H_7O_2^-$                       | Acetoin                     | 87.0452    | 87.0451 (-0.1)      |              | W       |               |         |               | W       |
| $C_5H_7O_3^-$                       | Unassigned                  | 115.0401   | 115.0404 (2.5)      |              | W       |               |         |               | W       |
| $C_5H_7O_4^-$                       | Acetolactic Acid            | 131.0350   | 131.0350 (0.0)      |              | W       |               |         |               |         |
| $C_9H_{17}O_2^-$                    | Nonanoic Acid               | 157.1234   | 157.1241 (4.4)      |              |         | S             | S       |               |         |
| $C_7H_{11}O_4^-$                    | Unassigned                  | 159.0663   | 159.0665 (1.2)      |              | W       |               |         |               | W       |
| $C_6H_9O_6^-$                       | Unassigned                  | 161.0455   | 161.0465 (5.8)      |              |         |               |         |               | W       |
| $C_6H_7O_6^-$                       | Parapyruvic Acid*           | 175.0248   | 175.0250 (1.0)      | W            |         |               |         |               |         |
| $C_7H_{11}O_5^-$                    | DMOHA                       | 175.0612   | 175.0618 (3.4)      |              | S       |               |         |               | S       |
| $C_6H_9O_6^-$                       | Dimethyltartaric Acid       | 177.0405   | 177.0410 (3.0)      |              | M       |               |         |               | M       |
| $C_8H_6O_6Na^-$                     | Na Adduct of 2 PA-          | 197.0068   | 197.0074 (3.1)      | M            | M       |               |         | M             | M       |
| Unidentified                        |                             |            | 217.0719 ± 0.0006   |              | W       |               |         |               | W       |
| Unidentified                        |                             |            | 225.1115 ± 0.0004   |              |         | M             | M       |               |         |
| $C_{10}H_{13}O_6^-$                 | Unassigned                  | 229.0718   | 229.0722 (2.1)      |              |         |               |         |               | W       |
| $C_{10}H_{15}O_6^-$                 | Unassigned                  | 231.0874   | 231.0876 (0.8)      |              |         |               |         |               | W       |
| Unidentified                        |                             |            | 243.1607            |              |         |               |         |               | M       |
| $C_{12}H_{21}O_5^-$                 | Cross-Product of PA + NA    | 245.1394   | 245.1400 (2.3)      |              |         |               |         |               | M       |
| $C_{10}H_{14}O_8Na^-$               | Na Adduct of PA- and DMOHA- | 285.0592   | 285.0598 (2.2)      |              | W       |               |         |               | W       |
| $C_9H_{12}O_9Na^-$                  | Na Adduct of PA- and DMTA-  | 287.0384   | 287.0391 (2.3)      |              | W       |               |         |               | W       |



|                                                                             |                       |          |                      |   |   |   |   |   |   |
|-----------------------------------------------------------------------------|-----------------------|----------|----------------------|---|---|---|---|---|---|
| Unidentified                                                                |                       |          | 293.0985<br>± 0.0004 |   |   | W | W |   |   |
| C <sub>9</sub> H <sub>9</sub> O <sub>9</sub> Ca <sup>-</sup>                | Ca Adduct of 3<br>PA- | 300.9877 | 300.9881<br>(1.0)    | M | M |   |   | W | W |
| C <sub>9</sub> H <sub>9</sub> O <sub>9</sub> Na <sub>2</sub> <sup>-</sup>   | Na Adduct of 3<br>PA- | 307.0047 | 307.0052<br>(1.4)    | W | W |   |   | W |   |
| C <sub>18</sub> H <sub>34</sub> O <sub>4</sub> Na <sup>-</sup>              | Na Adduct of 2<br>NA- | 337.2360 | 337.2360<br>(-0.1)   |   |   | M | M | W |   |
| Unidentified                                                                |                       |          | 403.2355<br>± 0.0004 |   |   | M | M |   |   |
| Unidentified                                                                |                       |          | 473.2107<br>± 0.0004 |   |   | M | M |   |   |
| C <sub>27</sub> H <sub>51</sub> O <sub>6</sub> Ca <sup>-</sup>              | Ca Adduct of 3<br>NA- | 511.3317 | 511.3310<br>(-1.4)   |   |   | W | W |   |   |
| C <sub>27</sub> H <sub>51</sub> O <sub>6</sub> Na <sub>2</sub> <sup>-</sup> | Na Adduct of 3<br>NA- | 517.3487 | 517.3482<br>(-0.9)   |   |   | M | M |   |   |

**Table S4.** Compiled ESI<sup>-</sup> MS Data for Pyruvic Acid and Nonanol

|                                                              |                                |            |                        | Pyruvic Acid |         | Nonanol |         | Mixed PA +<br>NoL |         |
|--------------------------------------------------------------|--------------------------------|------------|------------------------|--------------|---------|---------|---------|-------------------|---------|
| Assigned<br>Formula<br>[M-H] <sup>-</sup>                    | Assigned<br>Structure          | Theor. m/z | Avg. Exp.<br>m/z (ppm) | Pre-hv       | Post-hv | Pre-hv  | Post-hv | Pre-hv            | Post-hv |
| C <sub>3</sub> H <sub>3</sub> O <sub>3</sub> <sup>-</sup>    | Pyruvic Acid                   | 87.0088    | 87.0093<br>(5.8)       | M            | M       |         |         | M                 | M       |
| C <sub>4</sub> H <sub>7</sub> O <sub>2</sub> <sup>-</sup>    | Acetoin                        | 87.0452    | 87.0454<br>(3.0)       |              | W       |         |         |                   |         |
| C <sub>5</sub> H <sub>7</sub> O <sub>3</sub> <sup>-</sup>    | Unassigned                     | 115.0401   | 115.0405<br>(4.0)      |              | W       |         |         |                   | W       |
| C <sub>5</sub> H <sub>7</sub> O <sub>4</sub> <sup>-</sup>    | Acetolactic Acid               | 131.0350   | 131.0352<br>(2.0)      |              | W       |         |         |                   |         |
| C <sub>7</sub> H <sub>11</sub> O <sub>4</sub> <sup>-</sup>   | Unassigned                     | 159.0663   | 159.0668<br>(3.3)      |              | W       |         |         |                   | W       |
| C <sub>6</sub> H <sub>9</sub> O <sub>6</sub> <sup>-</sup>    | Unassigned                     | 161.0450   | 161.0466<br>(6.8)      |              |         |         |         |                   | W       |
| C <sub>6</sub> H <sub>7</sub> O <sub>6</sub> <sup>-</sup>    | Parapyruvic<br>Acid*           | 175.0248   | 175.0250<br>(1.0)      | W            |         |         |         |                   |         |
| C <sub>7</sub> H <sub>11</sub> O <sub>5</sub> <sup>-</sup>   | DMOHA                          | 175.0612   | 175.0620<br>(4.5)      |              | S       |         |         |                   | S       |
| C <sub>6</sub> H <sub>9</sub> O <sub>6</sub> <sup>-</sup>    | Dimethyltartaric<br>Acid       | 177.0405   | 177.0411<br>(3.8)      |              | M       |         |         |                   | M       |
| C <sub>6</sub> H <sub>6</sub> O <sub>6</sub> Na <sup>-</sup> | Na Adduct of 2<br>PA-          | 197.0068   | 197.0075<br>(3.8)      | M            | M       |         |         | M                 | W       |
| Unidentified                                                 |                                |            | 217.0719 ±<br>0.0006   |              | W       |         |         |                   | W       |
| C <sub>12</sub> H <sub>23</sub> O <sub>4</sub> <sup>-</sup>  | Cross Product<br>of PA and NoL | 231.1602   | 231.1607<br>(2.2)      |              |         |         |         |                   | M       |
| Unidentified                                                 |                                |            | 258.9780               |              |         |         |         | W                 | W       |

|                       |                             |          |                |   |   |  |  |   |   |
|-----------------------|-----------------------------|----------|----------------|---|---|--|--|---|---|
| $C_{10}H_{14}O_8Na^-$ | Na Adduct of PA- and DMOHA- | 285.0592 | 285.0598 (2.2) |   | W |  |  |   | W |
| $C_9H_{12}O_9Na^-$    | Na Adduct of PA- and DMTA-  | 287.0384 | 287.0391 (2.3) |   | W |  |  |   | W |
| $C_9H_9O_9Ca^-$       | Ca Adduct of 3 PA-          | 300.9878 | 300.9884 (2.0) | M | M |  |  | M | W |
| $C_9H_9O_9Na_2^-$     | Na Adduct of 3 PA-          | 307.0047 | 307.0053 (1.8) | W | W |  |  | W |   |

**Table S5.** Compiled ESI<sup>-</sup> MS Data for OOA and Nonanol

| Assigned Formula [M-H] <sup>-</sup> | Assigned Structure         | Theor. m/z | Avg. Exp. m/z (ppm) | 2-Oxooctanoic Acid |         | Nonanol |         | Mixed OOA + NoL |         |
|-------------------------------------|----------------------------|------------|---------------------|--------------------|---------|---------|---------|-----------------|---------|
|                                     |                            |            |                     | Pre-hv             | Post-hv | Pre-hv  | Post-hv | Pre-hv          | Post-hv |
| $C_3H_3O_3^-$                       | Pyruvic Acid               | 87.0088    | 87.0093 (5.8)       |                    | W       |         |         |                 | W       |
| $C_7H_{13}O_2^-$                    | Heptanoic Acid             | 129.0921   | 129.0930 (6.9)      | M                  | M       |         |         | M               | M       |
| $C_8H_{11}O_2^-$                    | Unassigned                 | 139.0765   | 139.0775 (7.5)      |                    | M       |         |         |                 | W       |
| $C_8H_{13}O_3^-$                    | 2-Oxooctanoic Acid         | 157.0870   | 157.0880 (6.3)      | S                  | S       |         |         | S               | S       |
| $C_9H_{17}O_2^-$                    | Nonanoic Acid              | 157.1234   | 157.1240 (3.8)      | W                  | W       |         |         |                 |         |
| $C_8H_{13}O_4^-$                    | 2,2-DHOA                   | 173.0819   | 173.0828 (4.7)      | M                  | M       |         |         | M               | M       |
| $C_6H_9O_6^-$                       | Dimethyltartaric Acid      | 177.0405   | 177.0405 (0.2)      |                    | W       |         |         |                 |         |
| $C_{14}H_{27}O_2^-$                 | 8-hydroxy-tetradecan-7-one | 227.2017   | 227.2017 (0.1)      |                    | W       |         |         |                 |         |
| $C_{11}H_{17}O_6^-$                 | R-PPA                      | 245.1031   | 245.1400 (2.3)      |                    | W       |         |         |                 |         |
| $C_{12}H_{21}O_5^-$                 | R-DHO Acid                 | 245.1394   | 245.1400 (2.3)      |                    | M       |         |         |                 | W       |
| $C_{11}H_{19}O_6^-$                 | Methylhexyl-tartaric Acid  | 247.1187   | 247.1193 (2.2)      |                    | S       |         |         |                 | M       |
| $C_{15}H_{27}O_3^-$                 | Unassigned                 | 255.1966   | 255.1968 (0.7)      |                    | M       |         |         |                 | W       |
| Unidentified                        |                            |            | 269.1763 ± 0.0004   |                    | M       |         |         |                 | W       |
| $C_{15}H_{27}O_4^-$                 | 8-C-8-H-tetradecan-7-one   | 271.1915   | 271.1920 (1.9)      |                    | M       |         |         |                 | W       |
| $C_{15}H_{29}O_4^-$                 | Unassigned                 | 273.2071   | 273.2070 (-0.5)     |                    | W       |         |         |                 | W       |
| $C_{13}H_{28}O_5Na^+$               | Unassigned                 | 287.1840   | 287.1868 (9.6)      |                    | W       |         |         |                 | W       |

|                         |                                       |          |                    |   |   |  |  |   |   |
|-------------------------|---------------------------------------|----------|--------------------|---|---|--|--|---|---|
| $C_{13}H_{21}O_7^-$     | R-DHO Diacid                          | 289.1293 | 289.1295<br>(0.8)  |   | W |  |  |   |   |
| $C_{17}H_{33}O_4^-$     | Cross Product<br>of OOA and NoL       | 301.2384 | 301.2390<br>(1.7)  |   |   |  |  |   | M |
| $C_{16}H_{25}O_6^-$     | R,R-DODA                              | 313.1657 | 313.1661<br>(1.5)  | M | M |  |  | W | M |
| $C_{16}H_{27}O_6^-$     | R,R-PPA                               | 315.1813 | 315.1802<br>(-3.5) | W | W |  |  | W | W |
| $C_{17}H_{31}O_5^-$     | R,R-DHO Acid                          | 315.2177 | 315.2180<br>(1.0)  |   | S |  |  |   | M |
| $C_{16}H_{29}O_6^-$     | Dihexyltartaric<br>Acid               | 317.1970 | 317.1975<br>(1.7)  |   | S |  |  |   | S |
| $C_{16}H_{26}O_6Na^-$   | Na Adduct of 2<br>OOA-                | 337.1633 | 337.1635<br>(0.7)  | S | M |  |  | M | M |
| $C_{16}H_{26}O_7Na^-$   | Na Adduct of<br>OOA- and OOA<br>Diol- | 353.1582 | 353.1573<br>(-2.6) | M | W |  |  | W |   |
| $C_{18}H_{31}O_7^-$     | R,R-DHO Diacid                        | 359.2075 | 359.2073<br>(-0.8) |   | W |  |  |   | W |
| $C_{22}H_{41}O_5^-$     | R,R,R-DHO<br>Acid                     | 385.2959 | 385.2957<br>(-0.7) |   | M |  |  |   | W |
| $C_{23}H_{41}O_7^-$     | R,R,R-DHO<br>Diacid                   | 429.2858 | 429.2850<br>(-1.8) |   | W |  |  |   |   |
| $C_{26}H_{41}O_9^-$     | Unassigned                            | 497.2756 | 497.2720<br>(-7.3) |   | W |  |  |   | W |
| $C_{24}H_{39}O_9Ca^-$   | Ca Adduct of 3<br>OOA-                | 511.2225 | 511.2221<br>(-0.8) | M | W |  |  | M | M |
| $C_{24}H_{39}O_9Na_2^-$ | Na Adduct of 3<br>OOA-                | 517.2395 | 517.2390<br>(-1.0) | M |   |  |  | W | W |

Notes: Chemical formulas are assigned as the ionized  $[M-H]^-$  species, structures are assigned as the neutral species. The theoretical m/z for each species is given, where known. The experimental mass differences from this value were <15 ppm for each species assigned for each experiment, with typical values of <8 ppm. The experimental m/z and mass differences reported are average values combined across all experiments in which the analyte was detected. Where the peak has not been assigned, the average m/z value across experiments is given, with uncertainties given as a 95% confidence interval.

S = Strong, M = Medium, W = Weak

Blank entries indicate that the species was not observed with an intensity above the cut-off threshold, which was set conservatively at  $10^4$  counts.

2,2-DHOA = 2,2-Dihydroxyoctanoic Acid, Diol of OOA

DMOHA = 2,4-dihydroxy-2-methyl-5-oxohexanoic acid

8-C-8-H-tetradecan-7-one = 8-carboxy-8-hydroxy-tetradecan-7-one

† Assignment is tentative

**Table S6.** Compiled ESI<sup>-</sup> MS Data for OOA Dissolved in Methanol

|                                           |                       |            |                     | OOA in MeOH |         |
|-------------------------------------------|-----------------------|------------|---------------------|-------------|---------|
| Assigned<br>Formula<br>[M-H] <sup>-</sup> | Assigned<br>Structure | Theor. m/z | Avg. Exp. m/z (ppm) | Pre-hv      | Post-hv |
| $C_3H_3O_3^-$                             | Pyruvic Acid          | 87.0088    | 87.0089 (1.5)       |             | M       |
| $C_7H_{13}O_2^-$                          | Heptanoic Acid        | 129.0921   | 129.0926 (3.7)      | S           | S       |

|                       |                                 |          |                 |   |   |
|-----------------------|---------------------------------|----------|-----------------|---|---|
| $C_8H_{11}O_2^-$      | Unassigned                      | 139.0765 | 139.0771 (4.7)  |   | M |
| $C_8H_{13}O_3^-$      | 2-Oxooctanoic Acid              | 157.0870 | 157.0876 (3.9)  | S | S |
| $C_9H_{17}O_2^-$      | Nonanoic Acid                   | 157.1234 | 157.1237 (2.1)  | W | W |
| $C_8H_{13}O_4^-$      | 2,2-DHOA                        | 173.0819 | 173.0825 (3.3)  | S | S |
| $C_7H_{11}O_5^-$      | DMOHA                           | 175.0614 | 175.0606 (-3.4) |   | W |
| $C_6H_9O_6^-$         | Dimethyltartaric Acid           | 177.0405 | 177.0411 (3.3)  |   | M |
| $C_9H_{17}O_4^-$      | Cross Product of OOA and MeOH   | 189.1132 | 189.1139 (3.5)  | W | S |
| $C_{10}H_{19}O_4^-$   | Unassigned                      | 203.1288 | 203.1295 (3.2)  | M | M |
| Unidentified          |                                 |          | 207.0517        |   | M |
| Unidentified          |                                 |          | 219.0517        |   | M |
| $C_{14}H_{27}O_2^-$   | 8-hydroxy-tetradecan-7-one      | 227.2017 | 227.2018 (0.6)  |   | W |
| Unidentified          |                                 |          | 237.0622        |   | M |
| $C_{11}H_{17}O_6^-$   | R-PPA                           | 245.1031 | 245.1037 (2.4)  |   | W |
| $C_{12}H_{21}O_5^-$   | R-DHO Acid                      | 245.1394 | 245.1403 (3.5)  |   | M |
| $C_{11}H_{19}O_6^-$   | Methylhexyl-tartaric Acid       | 247.1187 | 247.1191 (1.6)  |   | S |
| $C_{15}H_{27}O_3^-$   | Unassigned                      | 255.1966 | 255.1960 (-2.4) |   | M |
| $C_{12}H_{19}O_6^-$   | Unassigned                      | 259.1187 | 259.1190 (1.1)  |   | S |
| Unidentified          |                                 |          | 269.1757        |   | M |
| Unidentified          |                                 |          | 275.1501        |   | M |
| Unidentified          |                                 |          | 277.1297        |   | S |
| Unidentified          |                                 |          | 285.1709        | M | M |
| $C_{16}H_{25}O_6^-$   | R,R-DODA                        | 313.1657 | 313.1659 (0.8)  | M | M |
| $C_{16}H_{29}O_6^-$   | Dihexyltartaric Acid            | 317.1970 | 317.1970 (0.0)  |   | S |
| $C_{16}H_{26}O_6Na^-$ | Na Adduct of 2 OOA-             | 337.1633 | 337.1641 (2.4)  | S | M |
| $C_{16}H_{26}O_7Na^-$ | Na Adduct of OOA- and OOA Diol- | 353.1582 | 353.1578 (-1.1) | M | W |
| $C_{18}H_{31}O_7^-$   | R,R-DHO Diacid                  | 359.2075 | 359.2073 (-0.8) |   | W |
| Unidentified          |                                 |          | 387.2197        | S |   |
| $C_{24}H_{39}O_9Ca^-$ | Ca Adduct of 3 OOA-             | 511.2225 | 511.2229 (0.6)  | M | W |

**Table S7.** Electronic Structure Calculation Data: Propionic Acid

| Cartesian Coordinates (Å):                          |           |                     |           |
|-----------------------------------------------------|-----------|---------------------|-----------|
| C                                                   | 0.563733  | 0.106791            | -0.000036 |
| C                                                   | -0.691126 | -0.736027           | -0.000195 |
| C                                                   | -1.971125 | 0.094583            | 0.000159  |
| O                                                   | 1.678078  | -0.667168           | 0.000139  |
| O                                                   | 0.612669  | 1.309880            | -0.000089 |
| H                                                   | -0.639855 | -1.397729           | 0.870832  |
| H                                                   | -2.019862 | 0.738689            | 0.879973  |
| H                                                   | -2.848173 | -0.556441           | 0.000183  |
| H                                                   | -2.020172 | 0.739015            | -0.879396 |
| H                                                   | 2.433125  | -0.060270           | 0.000212  |
| Harmonic Vibration Frequencies (cm <sup>-1</sup> ): |           |                     |           |
| 54.0838                                             | 194.3315  | 250.4081            | 466.9120  |
| 520.1678                                            | 616.3077  | 663.1325            | 815.9129  |
| 818.0480                                            | 1011.1317 | 1082.6862           | 1112.4933 |
| 1168.1050                                           | 1283.1439 | 1311.8993           | 1407.3020 |
| 1422.5820                                           | 1464.1958 | 1494.7021           | 1504.0592 |
| 1829.6991                                           | 3038.5034 | 3044.4414           | 3064.2989 |
| 3110.1123                                           | 3115.6713 | 3759.1615           |           |
| Energetics:                                         |           |                     |           |
| CBS-QB3 Energy =                                    |           | -267.985656 hartree |           |
| CBS-QB3 Enthalpy =                                  |           | -267.984712 hartree |           |
| CBS-QB3 Free Energy =                               |           | -268.020784 hartree |           |

**Table S8.** Electronic Structure Calculation Data: Alpha-Propionyl Radical

| Cartesian Coordinates (Å):                          |           |                     |           |
|-----------------------------------------------------|-----------|---------------------|-----------|
| C                                                   | 0.545234  | 0.086340            | -0.000011 |
| C                                                   | -0.693180 | -0.662576           | -0.000022 |
| C                                                   | -2.006560 | 0.021627            | 0.000019  |
| O                                                   | 1.643298  | -0.721583           | 0.000015  |
| O                                                   | 0.635169  | 1.300776            | -0.000014 |
| H                                                   | -0.630683 | -1.744400           | -0.000096 |
| H                                                   | -1.878397 | 1.103919            | 0.000141  |
| H                                                   | -2.600934 | -0.266901           | -0.876779 |
| H                                                   | 2.410211  | -0.131413           | 0.000070  |
| Harmonic Vibration Frequencies (cm <sup>-1</sup> ): |           |                     |           |
| 92.8094                                             | 151.2975  | 259.7703            | 482.0871  |
| 523.8215                                            | 609.0210  | 623.3863            | 740.4152  |
| 835.6772                                            | 991.3542  | 1060.7819           | 1112.1891 |
| 1173.9460                                           | 1306.4940 | 1396.7702           | 1439.7262 |
| 1474.0438                                           | 1499.5985 | 1714.1527           | 2994.9754 |
| 3026.9234                                           | 3125.7182 | 3189.8983           | 3774.9722 |
| Energetics:                                         |           |                     |           |
| CBS-QB3 Energy =                                    |           | -267.338318 hartree |           |
| CBS-QB3 Enthalpy =                                  |           | -267.337374 hartree |           |
| CBS-QB3 Free Energy =                               |           | -267.373755 hartree |           |

**Table S9.** Electronic Structure Calculation Data: Pyruvic acid  $^3(n,\pi^*)$  state

| Cartesian Coordinates (Å):                          |           |                     |           |
|-----------------------------------------------------|-----------|---------------------|-----------|
| C                                                   | -1.798715 | -0.741322           | 0.004418  |
| C                                                   | -0.654931 | 0.236256            | 0.002499  |
| C                                                   | 0.721080  | -0.233310           | -0.002630 |
| O                                                   | 1.614247  | 0.790849            | -0.003678 |
| O                                                   | 1.048941  | -1.409516           | -0.005760 |
| O                                                   | -0.898972 | 1.493174            | 0.005299  |
| H                                                   | -1.362585 | -1.741604           | 0.000230  |
| H                                                   | -2.428809 | -0.604848           | -0.879273 |
| H                                                   | -2.421961 | -0.609388           | 0.893655  |
| H                                                   | 2.495018  | 0.390041            | -0.007221 |
| Harmonic Vibration Frequencies (cm <sup>-1</sup> ): |           |                     |           |
| 121.2752                                            | 137.9882  | 237.3834            | 304.6244  |
| 349.4645                                            | 494.9044  | 510.4565            | 551.6879  |
| 672.1335                                            | 760.7918  | 997.8989            | 1023.5836 |
| 1096.9460                                           | 1193.7874 | 1312.8923           | 1366.9864 |
| 1404.5718                                           | 1456.4856 | 1484.4932           | 1687.3367 |
| 3020.7945                                           | 3080.0122 | 3122.4437           | 3779.1842 |
| Energetics:                                         |           |                     |           |
| CBS-QB3 Energy =                                    |           | -341.826975 hartree |           |
| CBS-QB3 Enthalpy =                                  |           | -341.826031 hartree |           |
| CBS-QB3 Free Energy =                               |           | -341.864614 hartree |           |

**Table S10.** Electronic Structure Calculation Data: Alpha-hydroxy-alpha-propionyl radical

| Cartesian Coordinates (Å):                          |           |                     |           |
|-----------------------------------------------------|-----------|---------------------|-----------|
| C                                                   | 0.775447  | 0.009761            | 0.000010  |
| C                                                   | -0.658021 | 0.084842            | -0.000560 |
| C                                                   | -1.627560 | -1.035742           | 0.000190  |
| O                                                   | -1.161277 | 1.330208            | -0.000116 |
| O                                                   | 1.291728  | -1.246777           | -0.000158 |
| O                                                   | 1.476755  | 1.019372            | 0.000310  |
| H                                                   | -1.108547 | -1.992226           | -0.008774 |
| H                                                   | -2.283738 | -0.978190           | -0.875898 |
| H                                                   | -2.271117 | -0.988768           | 0.886391  |
| H                                                   | -0.386519 | 1.924292            | 0.000305  |
| H                                                   | 2.253079  | -1.140695           | -0.000146 |
| Harmonic Vibration Frequencies (cm <sup>-1</sup> ): |           |                     |           |
| 100.5276                                            | 142.9462  | 249.6052            | 312.5716  |
| 376.3218                                            | 512.8432  | 516.2796            | 585.4922  |
| 686.2913                                            | 701.4101  | 767.5449            | 1008.3421 |
| 1022.4657                                           | 1130.1845 | 1192.1805           | 1342.2861 |
| 1393.1006                                           | 1447.4320 | 1469.5232           | 1471.2538 |
| 1543.9159                                           | 1698.2366 | 3010.5211           | 3048.8812 |
| 3146.4547                                           | 3619.5396 | 3785.1392           |           |
| Energetics:                                         |           |                     |           |
| CBS-QB3 Energy =                                    |           | -342.501262 hartree |           |
| CBS-QB3 Enthalpy =                                  |           | -342.500317 hartree |           |
| CBS-QB3 Free Energy =                               |           | -342.538671 hartree |           |

**References:**

1. Rapf, R. J.; Perkins, R. J.; Yang, H.; Miyake, G. M.; Carpenter, B. K.; Vaida, V. Photochemical synthesis of oligomeric amphiphiles from alkyl oxoacids in aqueous environments. *J. Am. Chem. Soc.* **2017**, *139*, 6946–6959.
2. Ogg, R. J.; Kingsley, R.; Taylor, J. S. WET, a T<sub>1</sub>- and B<sub>1</sub>-insensitive water-suppression method for in vivo localized <sup>1</sup>H NMR spectroscopy. *J. Magn. Reson., Ser B* **1994**, *104*, 1-10.
